# Supplementary material for: LSTMCNNsucc: A Bidirectional LSTM and CNN-Based Deep Learning Method for Predicting Lysine Succinylation Sites
Source: PubMed Central journal article supplement (PMC8188601; doi:10.1155/2021/9923112), 2021-05-28
Supplement: 9923112.f1.pdf [file 9923112.f1.pdf]

| Category              | EC Term                                    | Count | %    | P-Value  | Benjamini |
|-----------------------|--------------------------------------------|-------|------|----------|-----------|
| KEGGPathway           | Metabolic pathways                         | 234   | 29.4 | 3.30E-10 | 3.30E-08  |
| KEGGPathway           | Biosynthesis of amino acids                | 59    | 7.4  | 2.00E-08 | 1.00E-06  |
| KEGGPathway           | Biosynthesis of secondary metabolites      | 108   | 13.6 | 7.10E-06 | 2.40E-04  |
| KEGGPathway           | Biosynthesis of antibiotics                | 76    | 9.5  | 3.00E-05 | 7.40E-04  |
| KEGGPathway           | Lysine biosynthesis                        | 12    | 1.5  | 1.70E-04 | 3.30E-03  |
| KEGGPathway           | 2-Oxocarboxylic acid metabolism            | 15    | 1.9  | 2.20E-03 | 3.70E-02  |
| homo-sapiens Category | Term                                       | Count | %    | P-Value  | Benjamini |
| KEGG_PATHWAY          | Biosynthesis of antibiotics                | 32    | 8    | 2.00E-12 | 3.70E-10  |
| KEGG_PATHWAY          | Metabolic pathways                         | 83    | 20.6 | 2.90E-11 | 2.80E-09  |
| KEGG_PATHWAY          | Ribosome                                   | 23    | 5.7  | 5.50E-10 | 3.40E-08  |
| KEGG_PATHWAY          | Valine, leucine and isoleucine degradation | 13    | 3.2  | 2.70E-08 | 1.30E-06  |
| KEGG_PATHWAY          | Carbon metabolism                          | 18    | 4.5  | 1.60E-07 | 6.20E-06  |
| KEGG_PATHWAY          | Oxidative phosphorylation                  | 19    | 4.7  | 3.60E-07 | 1.10E-05  |
| KEGG_PATHWAY          | Parkinson's disease                        | 19    | 4.7  | 9.80E-07 | 2.60E-05  |
| KEGG_PATHWAY          | Citrate cycle (TCA cycle)                  | 9     | 2.2  | 4.30E-06 | 1.00E-04  |
| KEGG_PATHWAY          | Huntington's disease                       | 20    | 5    | 2.00E-05 | 4.10E-04  |
| KEGG_PATHWAY          | Alzheimer's disease                        | 18    | 4.5  | 4.10E-05 | 7.80E-04  |
| KEGG_PATHWAY          | Aminoacyl-tRNA biosynthesis                | 11    | 2.7  | 5.80E-05 | 1.00E-03  |
| KEGG_PATHWAY          | Butanoate metabolism                       | 7     | 1.7  | 2.10E-04 | 3.40E-03  |
| KEGG_PATHWAY          | Proteasome                                 | 8     | 2    | 5.70E-04 | 8.20E-03  |
| KEGG_PATHWAY          | Fatty acid degradation                     | 7     | 1.7  | 2.50E-03 | 3.30E-02  |
| KEGG_PATHWAY          | Biosynthesis of amino acids                | 9     | 2.2  | 2.60E-03 | 3.30E-02  |
| KEGG_PATHWAY          | Synthesis and degradation of ketone bodies | 4     | 1    | 3.70E-03 | 4.40E-02  |
| KEGG_PATHWAY          | DNA replication                            | 6     | 1.5  | 6.50E-03 | 7.20E-02  |
| mus-musculus Category | Term                                       | Count | %    | P-Value  | Benjamini |
| KEGG_PATHWAY          | Metabolic pathways                         | 138   | 25.4 | 2.80E-28 | 6.20E-26  |
| KEGG_PATHWAY          | Parkinson's disease                        | 31    | 5.7  | 7.60E-13 | 8.50E-11  |

|                            |                                              |       |      |          |           |
|----------------------------|----------------------------------------------|-------|------|----------|-----------|
| KEGG_PATHWAY               | Oxidative phosphorylation                    | 29    | 5.3  | 4.60E-12 | 3.40E-10  |
| KEGG_PATHWAY               | Non-alcoholic fatty liver disease (NAFLD)    | 30    | 5.5  | 1.80E-11 | 1.00E-09  |
| KEGG_PATHWAY               | Huntington's disease                         | 33    | 6.1  | 6.20E-11 | 2.80E-09  |
| KEGG_PATHWAY               | Alzheimer's disease                          | 30    | 5.5  | 3.70E-10 | 1.40E-08  |
| KEGG_PATHWAY               | Ribosome                                     | 25    | 4.6  | 1.00E-08 | 3.30E-07  |
| KEGG_PATHWAY               | Peroxisome                                   | 18    | 3.3  | 6.30E-08 | 1.80E-06  |
| KEGG_PATHWAY               | Glycine, serine and threonine metabolism     | 12    | 2.2  | 6.20E-07 | 1.50E-05  |
| KEGG_PATHWAY               | Pyruvate metabolism                          | 11    | 2    | 4.10E-06 | 9.00E-05  |
| KEGG_PATHWAY               | Propanoate metabolism                        | 9     | 1.7  | 1.20E-05 | 2.40E-04  |
| KEGG_PATHWAY               | Valine, leucine and isoleucine degradation   | 11    | 2    | 1.00E-04 | 1.90E-03  |
| KEGG_PATHWAY               | Glyoxylate and dicarboxylate metabolism      | 8     | 1.5  | 1.80E-04 | 3.10E-03  |
| KEGG_PATHWAY               | Biosynthesis of antibiotics                  | 22    | 4.1  | 3.50E-04 | 5.60E-03  |
| KEGG_PATHWAY               | Fatty acid metabolism                        | 9     | 1.7  | 1.40E-03 | 2.10E-02  |
| KEGG_PATHWAY               | Arginine and proline metabolism              | 8     | 1.5  | 4.70E-03 | 6.50E-02  |
| KEGG_PATHWAY               | Aminoacyl-tRNA biosynthesis                  | 9     | 1.7  | 7.20E-03 | 9.40E-02  |
| KEGG_PATHWAY               | One carbon pool by folate                    | 5     | 0.9  | 7.90E-03 | 9.70E-02  |
| Mycobacterium tuberculosis |                                              |       |      |          |           |
| Category                   | Term                                         | Count | %    | P-Value  | Benjamini |
| KEGG_PATHWAY               | Metabolic pathways                           | 170   | 30.4 | 1.00E-06 | 1.00E-04  |
| KEGG_PATHWAY               | Microbial metabolism in diverse environments | 74    | 13.2 | 5.00E-06 | 2.50E-04  |
| KEGG_PATHWAY               | Biosynthesis of antibiotics                  | 79    | 14.1 | 1.30E-05 | 4.40E-04  |
| KEGG_PATHWAY               | Biosynthesis of secondary metabolites        | 93    | 16.6 | 5.00E-04 | 1.00E-02  |
| KEGG_PATHWAY               | Propanoate metabolism                        | 24    | 4.3  | 5.00E-04 | 1.00E-02  |
| KEGG_PATHWAY               | Carbon metabolism                            | 40    | 7.2  | 1.50E-03 | 2.40E-02  |
| KEGG_PATHWAY               | Valine, leucine and isoleucine degradation   | 25    | 4.5  | 1.60E-03 | 2.40E-02  |

|                          |                                             |       |      |          |           |
|--------------------------|---------------------------------------------|-------|------|----------|-----------|
| KEGG_PATHWAY             | Glyoxylate and dicarboxylate metabolism     | 19    | 3.4  | 2.40E-03 | 3.00E-02  |
| KEGG_PATHWAY             | Fatty acid metabolism                       | 22    | 3.9  | 3.60E-03 | 4.00E-02  |
| KEGG_PATHWAY             | Biosynthesis of amino acids                 | 40    | 7.2  | 4.00E-03 | 4.00E-02  |
| KEGG_PATHWAY             | Ribosome                                    | 24    | 4.3  | 6.50E-03 | 6.00E-02  |
| KEGG_PATHWAY             | Fatty acid degradation                      | 21    | 3.8  | 8.60E-03 | 7.30E-02  |
| Saccharomyces cerevisiae |                                             |       |      |          |           |
| Category                 | Term                                        | Count | %    | P-Value  | Benjamini |
| KEGG_PATHWAY             | Metabolic pathways                          | 82    | 27.5 | 6.60E-07 | 5.20E-05  |
| KEGG_PATHWAY             | Biosynthesis of amino acids                 | 25    | 8.4  | 8.10E-06 | 3.30E-04  |
| KEGG_PATHWAY             | 2-Oxocarboxylic acid metabolism             | 12    | 4    | 2.90E-05 | 7.90E-04  |
| KEGG_PATHWAY             | Biosynthesis of antibiotics                 | 32    | 10.7 | 2.10E-04 | 3.50E-03  |
| KEGG_PATHWAY             | Oxidative phosphorylation                   | 16    | 5.4  | 2.20E-04 | 3.50E-03  |
| KEGG_PATHWAY             | Biosynthesis of secondary metabolites       | 38    | 12.8 | 8.60E-04 | 1.10E-02  |
| KEGG_PATHWAY             | Amino sugar and nucleotide sugar metabolism | 9     | 3    | 2.00E-03 | 2.30E-02  |
| KEGG_PATHWAY             | Proteasome                                  | 9     | 3    | 3.70E-03 | 3.70E-02  |
| KEGG_PATHWAY             | Valine, leucine and isoleucine biosynthesis | 5     | 1.7  | 9.80E-03 | 8.70E-02  |
