# Supplementary material for: LSTMCNNsucc: A Bidirectional LSTM and CNN-Based Deep Learning Method for Predicting Lysine Succinylation Sites
Source: PubMed Central journal article supplement (PMC8188601; doi:10.1155/2021/9923112), 2021-05-28
Supplement: 9923112.f2.pdf [file 9923112.f2.pdf]

Analysis Type: PANTHER Overrepresentation Test (Released 20200728)

Annotation Version and Release Date: PANTHER version 15.0 Released 2020-02-14

Analyzed List: protein.txt (Escherichia coli)

Reference List: Escherichia coli (all genes in database)

Test Type: FISHER

Correction: FDR

PANTHER GO-Slim Biological Process Escherichia protein.txt protein.txt protein.txt protein.txt protein.txt protein.txt (FDR)

|                                                           |     |     |          |      |          |          |
|-----------------------------------------------------------|-----|-----|----------|------|----------|----------|
| cellular metabolic process (GO:0044237)                   | 727 | 208 | 121.86 + | 1.71 | 4.82E-13 | 1.12E-10 |
| metabolic process (GO:0008152)                            | 797 | 222 | 133.59 + | 1.66 | 4.55E-13 | 1.59E-10 |
| organonitrogen compound metabolic process (GO:1901564)    | 326 | 118 | 54.64 +  | 2.16 | 1.64E-12 | 2.86E-10 |
| organonitrogen compound biosynthetic process (GO:1901566) | 215 | 92  | 36.04 +  | 2.55 | 4.16E-13 | 2.90E-10 |
| nitrogen compound metabolic process (GO:0006807)          | 573 | 173 | 96.04 +  | 1.8  | 2.27E-12 | 3.16E-10 |

|                                                                                  |     |     |          |      |          |          |
|----------------------------------------------------------------------------------|-----|-----|----------|------|----------|----------|
| organic<br>substance<br>metabolic<br>process<br>(GO:0071<br>704)                 | 719 | 202 | 120.52 + | 1.68 | 5.16E-12 | 6.00E-10 |
| cellular<br>biosynthe<br>tic<br>process<br>(GO:0044<br>249)                      | 412 | 133 | 69.06 +  | 1.93 | 3.96E-11 | 3.94E-09 |
| biosynthe<br>tic<br>process<br>(GO:0009<br>058)                                  | 420 | 134 | 70.4 +   | 1.9  | 5.75E-11 | 5.01E-09 |
| organic<br>substance<br>biosynthe<br>tic<br>process<br>(GO:1901<br>576)          | 409 | 130 | 68.55 +  | 1.9  | 1.88E-10 | 1.45E-08 |
| cellular<br>process<br>(GO:0009<br>987)                                          | 902 | 229 | 151.19 + | 1.51 | 6.48E-10 | 4.52E-08 |
| cellular<br>nitrogen<br>compoun<br>d<br>metabolic<br>process<br>(GO:0034<br>641) | 431 | 132 | 72.24 +  | 1.83 | 9.80E-10 | 6.21E-08 |
| carboxylic<br>acid<br>biosynthe<br>tic<br>process<br>(GO:0046<br>394)            | 86  | 46  | 14.41 +  | 3.19 | 2.79E-09 | 1.50E-07 |
| small<br>molecule<br>metabolic<br>process<br>(GO:0044<br>281)                    | 329 | 107 | 55.15 +  | 1.94 | 3.20E-09 | 1.59E-07 |
| organic<br>acid<br>biosynthe<br>tic<br>process<br>(GO:0016<br>053)               | 86  | 46  | 14.41 +  | 3.19 | 2.79E-09 | 1.62E-07 |

|                                                        |      |     |          |      |          |          |
|--------------------------------------------------------|------|-----|----------|------|----------|----------|
| small molecule biosynthetic process (GO:0044283)       | 131  | 58  | 21.96 +  | 2.64 | 4.28E-09 | 1.86E-07 |
| primary metabolic process (GO:0044238)                 | 606  | 166 | 101.58 + | 1.63 | 4.15E-09 | 1.93E-07 |
| oxoacid metabolic process (GO:0043436)                 | 213  | 77  | 35.7 +   | 2.16 | 2.04E-08 | 8.35E-07 |
| carboxylic acid metabolic process (GO:0019752)         | 209  | 76  | 35.03 +  | 2.17 | 2.53E-08 | 9.29E-07 |
| organic acid metabolic process (GO:0006082)            | 215  | 77  | 36.04 +  | 2.14 | 2.49E-08 | 9.64E-07 |
| organic cyclic compound metabolic process (GO:1901360) | 400  | 114 | 67.05 +  | 1.7  | 4.02E-07 | 1.40E-05 |
| biological _process (GO:0008150)                       | 1188 | 267 | 199.13 + | 1.34 | 5.58E-07 | 1.77E-05 |
| Unclassified (UNCLASSIFIED)                            | 3203 | 469 | 536.87 - | 0.87 | 5.58E-07 | 1.85E-05 |
| cellular amino acid biosynthetic process (GO:0008652)  | 65   | 33  | 10.9 +   | 3.03 | 1.14E-06 | 3.46E-05 |

|                                                                                 |     |     |         |      |          |          |
|---------------------------------------------------------------------------------|-----|-----|---------|------|----------|----------|
| heterocycle<br>metabolic<br>process<br>(GO:0046<br>483)                         | 382 | 108 | 64.03 + | 1.69 | 1.30E-06 | 3.62E-05 |
| cellular<br>nitrogen<br>compound<br>biosynthetic<br>process<br>(GO:0044<br>271) | 280 | 86  | 46.93 + | 1.83 | 1.28E-06 | 3.73E-05 |
| cellular<br>amino<br>acid<br>metabolic<br>process<br>(GO:0006<br>520)           | 115 | 46  | 19.28 + | 2.39 | 1.83E-06 | 4.92E-05 |
| cellular<br>amide<br>metabolic<br>process<br>(GO:0043<br>603)                   | 91  | 39  | 15.25 + | 2.56 | 3.04E-06 | 7.86E-05 |
| amide<br>biosynthetic<br>process<br>(GO:0043<br>604)                            | 71  | 33  | 11.9 +  | 2.77 | 5.72E-06 | 1.42E-04 |
| cellular<br>aromatic<br>compound<br>metabolic<br>process<br>(GO:0006<br>725)    | 388 | 106 | 65.03 + | 1.63 | 7.39E-06 | 1.78E-04 |
| alpha-<br>amino<br>acid<br>metabolic<br>process<br>(GO:1901<br>605)             | 81  | 34  | 13.58 + | 2.5  | 1.98E-05 | 4.59E-04 |
| organic<br>cyclic<br>compound<br>biosynthetic<br>process<br>(GO:1901<br>362)    | 234 | 69  | 39.22 + | 1.76 | 4.56E-05 | 1.03E-03 |

|                                                               |     |    |         |        |          |          |
|---------------------------------------------------------------|-----|----|---------|--------|----------|----------|
| heterocyclic biosynthetic process (GO:0018130)                | 223 | 64 | 37.38 + | 1.71   | 1.80E-04 | 3.91E-03 |
| macromolecule metabolic process (GO:0043170)                  | 374 | 94 | 62.69 + | 1.5    | 3.99E-04 | 8.42E-03 |
| gene expression (GO:0010467)                                  | 227 | 62 | 38.05 + | 1.63   | 7.20E-04 | 1.48E-02 |
| cofactor metabolic process (GO:0051186)                       | 82  | 29 | 13.74 + | 2.11   | 8.92E-04 | 1.78E-02 |
| cofactor biosynthetic process (GO:0051188)                    | 57  | 23 | 9.55 +  | 2.41   | 9.93E-04 | 1.92E-02 |
| aromatic compound biosynthetic process (GO:0019438)           | 222 | 60 | 37.21 + | 1.61   | 1.16E-03 | 2.19E-02 |
| nucleobase-containing compound metabolic process (GO:0006139) | 335 | 83 | 56.15 + | 1.48   | 1.31E-03 | 2.41E-02 |
| cell projection organization (GO:0030030)                     | 43  | 0  | 7.21 -  | < 0.01 | 1.83E-03 | 3.27E-02 |

|                                                       |     |    |         |      |          |          |
|-------------------------------------------------------|-----|----|---------|------|----------|----------|
| monocarboxylic acid biosynthetic process (GO:0072330) | 16  | 10 | 2.68 +  | 3.73 | 2.10E-03 | 3.66E-02 |
| peptide biosynthetic process (GO:0043043)             | 55  | 21 | 9.22 +  | 2.28 | 2.45E-03 | 4.16E-02 |
| RNA modification (GO:0009451)                         | 44  | 18 | 7.38 +  | 2.44 | 2.76E-03 | 4.47E-02 |
| monocarboxylic acid metabolic process (GO:0032787)    | 77  | 26 | 12.91 + | 2.01 | 2.73E-03 | 4.53E-02 |
| phosphorus metabolic process (GO:0006793)             | 107 | 33 | 17.93 + | 1.84 | 3.09E-03 | 4.89E-02 |
| translation (GO:0006412)                              | 52  | 20 | 8.72 +  | 2.29 | 3.26E-03 | 4.93E-02 |
| translational elongation (GO:0006414)                 | 52  | 20 | 8.72 +  | 2.29 | 3.26E-03 | 5.04E-02 |

Analysis Type: PANTHER Overrepresentation Test (Released 20200728)

Annotation Version and Release Date: PANTHER version 15.0 Released 2020-02-14

Analyzed List: protein.txt (Escherichia coli)

Reference List: Escherichia coli (all genes in database)

Test Type: FISHER

Correction: FDR

PANTHER GO-Slim Cellular Component Escherichia coli protein.txt protein.txt protein.txt protein.txt protein.txt protein.txt (FDR)

|                                                           |    |    |        |      |          |          |
|-----------------------------------------------------------|----|----|--------|------|----------|----------|
| ribosomal subunit (GO:0044391)                            | 27 | 12 | 4.53 + | 2.65 | 8.94E-03 | 3.81E-02 |
| intracellular organelle (GO:0043229)                      | 46 | 20 | 7.71 + | 2.59 | 1.05E-03 | 8.65E-03 |
| ribosome (GO:0005840)                                     | 30 | 13 | 5.03 + | 2.59 | 6.90E-03 | 3.17E-02 |
| ribonucleoprotein complex (GO:1990904)                    | 31 | 13 | 5.2 +  | 2.5  | 8.06E-03 | 3.57E-02 |
| intracellular non-membrane-bounded organelle (GO:0043232) | 36 | 15 | 6.03 + | 2.49 | 4.44E-03 | 2.69E-02 |
| organelle (GO:0043226)                                    | 53 | 22 | 8.88 + | 2.48 | 6.89E-04 | 7.20E-03 |

|                                                                                |     |     |          |      |          |          |
|--------------------------------------------------------------------------------|-----|-----|----------|------|----------|----------|
| outer<br>membran<br>e-<br>bounded<br>periplasm<br>ic space<br>(GO:0030<br>288) | 44  | 18  | 7.38 +   | 2.44 | 2.76E-03 | 1.76E-02 |
| periplasm<br>ic space<br>(GO:0042<br>597)                                      | 47  | 19  | 7.88 +   | 2.41 | 2.13E-03 | 1.44E-02 |
| non-<br>membran<br>e-<br>bounded<br>organelle<br>(GO:0043<br>228)              | 43  | 17  | 7.21 +   | 2.36 | 4.52E-03 | 2.36E-02 |
| organelle<br>part<br>(GO:0044<br>422)                                          | 40  | 15  | 6.7 +    | 2.24 | 1.07E-02 | 4.41E-02 |
| cytoplas<br>mic part<br>(GO:0044<br>444)                                       | 349 | 120 | 58.5 +   | 2.05 | 1.68E-11 | 4.83E-10 |
| cytoplas<br>m<br>(GO:0005<br>737)                                              | 468 | 156 | 78.44 +  | 1.99 | 4.85E-14 | 1.86E-12 |
| cytosol<br>(GO:0005<br>829)                                                    | 319 | 106 | 53.47 +  | 1.98 | 1.34E-09 | 3.08E-08 |
| intracellul<br>ar part<br>(GO:0044<br>424)                                     | 490 | 161 | 82.13 +  | 1.96 | 3.74E-14 | 4.30E-12 |
| intracellul<br>ar<br>(GO:0005<br>622)                                          | 494 | 162 | 82.8 +   | 1.96 | 4.28E-14 | 2.46E-12 |
| protein-<br>containin<br>g<br>complex<br>(GO:0032<br>991)                      | 117 | 34  | 19.61 +  | 1.73 | 6.32E-03 | 3.03E-02 |
| cell part<br>(GO:0044<br>464)                                                  | 998 | 207 | 167.28 + | 1.24 | 1.64E-03 | 1.26E-02 |
| cell<br>(GO:0005<br>623)                                                       | 998 | 207 | 167.28 + | 1.24 | 1.64E-03 | 1.18E-02 |



|                                                                                          |      |     |          |      |          |          |
|------------------------------------------------------------------------------------------|------|-----|----------|------|----------|----------|
| cellular_c<br>omponen<br>t<br>(GO:0005<br>575)<br>Unclassifi<br>ed<br>(UNCLAS<br>SIFIED) | 1025 | 208 | 171.81 + | 1.21 | 4.45E-03 | 2.44E-02 |
| cell<br>periphery<br>(GO:0071<br>944)                                                    | 467  | 43  | 78.28 -  | 0.55 | 2.56E-05 | 4.21E-04 |
| plasma<br>membran<br>e<br>(GO:0005<br>886)                                               | 467  | 43  | 78.28 -  | 0.55 | 2.56E-05 | 3.68E-04 |
| membran<br>e<br>(GO:0016<br>020)                                                         | 490  | 45  | 82.13 -  | 0.55 | 1.55E-05 | 2.98E-04 |
| membran<br>e part<br>(GO:0044<br>425)                                                    | 219  | 20  | 36.71 -  | 0.54 | 5.91E-03 | 2.96E-02 |
| intrinsic<br>compone<br>nt of<br>membran<br>e<br>(GO:0031<br>224)                        | 193  | 14  | 32.35 -  | 0.43 | 7.80E-04 | 6.90E-03 |
| integral<br>compone<br>nt of<br>membran<br>e<br>(GO:0016<br>021)                         | 177  | 11  | 29.67 -  | 0.37 | 2.80E-04 | 3.58E-03 |
| intrinsic<br>compone<br>nt of<br>plasma<br>membran<br>e<br>(GO:0031<br>226)              | 130  | 7   | 21.79 -  | 0.32 | 7.62E-04 | 7.30E-03 |
| integral<br>compone<br>nt of<br>plasma<br>membran<br>e<br>(GO:0005<br>887)               | 125  | 6   | 20.95 -  | 0.29 | 5.44E-04 | 6.25E-03 |

Analysis Type: PANTHER Overrepresentation Test (Released 20200728)

Annotation Version and Release Date: PANTHER version 15.0 Released 2020-02-14

Analyzed List: protein.txt (Escherichia coli)  
Reference List: Escherichia coli (all genes in database)

Test Type: FISHER

Correction: FDR

PANTHER GO-Slim Molecular Function: Escherichia coli protein.txt protein.txt protein.txt protein.txt protein.txt protein.txt (FDR)

|                                           |     |     |         |      |          |          |
|-------------------------------------------|-----|-----|---------|------|----------|----------|
| nucleoside phosphate binding (GO:1901265) | 47  | 19  | 7.88 +  | 2.41 | 2.13E-03 | 5.02E-02 |
| nucleotide binding (GO:0000166)           | 47  | 19  | 7.88 +  | 2.41 | 2.13E-03 | 4.63E-02 |
| kinase activity (GO:0016301)              | 69  | 26  | 11.57 + | 2.25 | 9.15E-04 | 2.59E-02 |
| ion binding (GO:0043167)                  | 129 | 40  | 21.62 + | 1.85 | 1.08E-03 | 2.78E-02 |
| binding (GO:0005488)                      | 358 | 107 | 60.01 + | 1.78 | 1.55E-07 | 1.09E-05 |
| nucleic acid binding (GO:0003676)         | 139 | 41  | 23.3 +  | 1.76 | 2.24E-03 | 4.53E-02 |
| transferase activity (GO:0016740)         | 286 | 84  | 47.94 + | 1.75 | 7.00E-06 | 3.96E-04 |

|                                                              |      |     |          |      |          |          |
|--------------------------------------------------------------|------|-----|----------|------|----------|----------|
| organic<br>cyclic<br>compound<br>binding<br>(GO:0097<br>159) | 229  | 66  | 38.38 +  | 1.72 | 1.49E-04 | 6.04E-03 |
| heterocyclic<br>compound<br>binding<br>(GO:1901<br>363)      | 229  | 66  | 38.38 +  | 1.72 | 1.49E-04 | 5.28E-03 |
| catalytic<br>activity<br>(GO:0003<br>824)                    | 842  | 241 | 141.13 + | 1.71 | 1.53E-15 | 4.33E-13 |
| hydrolase<br>activity<br>(GO:0016<br>787)                    | 228  | 60  | 38.22 +  | 1.57 | 2.34E-03 | 4.41E-02 |
| molecular<br>_function<br>(GO:0003<br>674)                   | 1283 | 325 | 215.05 + | 1.51 | 3.79E-15 | 5.37E-13 |
| Unclassified<br>(UNCLASSIFIED)                               | 3108 | 411 | 520.95 - | 0.79 | 3.79E-15 | 3.58E-13 |
| transporter<br>activity<br>(GO:0005<br>215)                  | 236  | 18  | 39.56 -  | 0.46 | 3.23E-04 | 1.02E-02 |
| transmembrane<br>transporter<br>activity<br>(GO:0022<br>857) | 231  | 16  | 38.72 -  | 0.41 | 1.20E-04 | 5.68E-03 |

Analysis Type: PANTHER Overrepresentation Test (Released 20200728)

Annotation Version and Release Date: PANTHER version 15.0 Released 2020-02-14

Analyzed List: protein.txt (Homo sapiens)

Reference List: Homo sapiens (all genes in database)

Test Type: FISHER

Correction: FDR

PANTHER GO-Slim Biological Process Homo sap protein.txt protein.txt protein.txt protein.txt protein.txt protein.txt

|                                                                                              |   |   |        |       |          |          |
|----------------------------------------------------------------------------------------------|---|---|--------|-------|----------|----------|
| pre-replicative complex assembly involved in nuclear cell cycle DNA replication (GO:0006267) | 8 | 4 | 0.15 + | 26.46 | 5.13E-05 | 1.07E-03 |
|----------------------------------------------------------------------------------------------|---|---|--------|-------|----------|----------|

|                                                                       |    |   |        |       |          |          |
|-----------------------------------------------------------------------|----|---|--------|-------|----------|----------|
| double-strand break repair via break-induced replication (GO:0000727) | 12 | 4 | 0.23 + | 17.64 | 1.78E-04 | 3.08E-03 |
|-----------------------------------------------------------------------|----|---|--------|-------|----------|----------|

|                                                                                            |    |    |        |       |          |          |
|--------------------------------------------------------------------------------------------|----|----|--------|-------|----------|----------|
| DNA unwinding<br>involved in DNA<br>replication<br>(GO:0006268)                            | 10 | 3  | 0.19 + | 15.88 | 1.58E-03 | 2.00E-02 |
| mitochondrial<br>RNA metabolic<br>process<br>(GO:0000959)                                  | 10 | 3  | 0.19 + | 15.88 | 1.58E-03 | 1.98E-02 |
| tricarboxylic acid<br>cycle<br>(GO:0006099)                                                | 17 | 5  | 0.32 + | 15.57 | 4.34E-05 | 9.24E-04 |
| ATP biosynthetic<br>process<br>(GO:0006754)                                                | 38 | 11 | 0.72 + | 15.32 | 1.20E-09 | 7.09E-08 |
| ATP synthesis<br>coupled proton<br>transport<br>(GO:0015986)                               | 38 | 11 | 0.72 + | 15.32 | 1.20E-09 | 6.90E-08 |
| energy coupled<br>proton transport,<br>down<br>electrochemical<br>gradient<br>(GO:0015985) | 38 | 11 | 0.72 + | 15.32 | 1.20E-09 | 6.71E-08 |
| purine nucleoside<br>triphosphate<br>biosynthetic<br>process<br>(GO:0009145)               | 40 | 11 | 0.76 + | 14.55 | 1.90E-09 | 9.13E-08 |

|                                                                                     |    |    |        |       |          |          |
|-------------------------------------------------------------------------------------|----|----|--------|-------|----------|----------|
| purine<br>ribonucleoside<br>triphosphate<br>biosynthetic<br>process<br>(GO:0009206) | 40 | 11 | 0.76 + | 14.55 | 1.90E-09 | 8.92E-08 |
|-------------------------------------------------------------------------------------|----|----|--------|-------|----------|----------|

|                                                                                  |    |    |        |       |          |          |
|----------------------------------------------------------------------------------|----|----|--------|-------|----------|----------|
| purine<br>ribonucleoside<br>triphosphate<br>metabolic<br>process<br>(GO:0009205) | 40 | 11 | 0.76 + | 14.55 | 1.90E-09 | 8.72E-08 |
|----------------------------------------------------------------------------------|----|----|--------|-------|----------|----------|

|                                                                                 |    |   |        |       |          |          |
|---------------------------------------------------------------------------------|----|---|--------|-------|----------|----------|
| mitochondrial<br>ATP synthesis<br>coupled electron<br>transport<br>(GO:0042775) | 22 | 6 | 0.42 + | 14.43 | 1.04E-05 | 2.57E-04 |
|---------------------------------------------------------------------------------|----|---|--------|-------|----------|----------|

|                                                                            |    |   |        |       |          |          |
|----------------------------------------------------------------------------|----|---|--------|-------|----------|----------|
| DNA strand<br>elongation<br>involved in DNA<br>replication<br>(GO:0006271) | 11 | 3 | 0.21 + | 14.43 | 1.98E-03 | 2.46E-02 |
|----------------------------------------------------------------------------|----|---|--------|-------|----------|----------|

|                                                                           |    |    |        |      |          |          |
|---------------------------------------------------------------------------|----|----|--------|------|----------|----------|
| purine nucleoside<br>triphosphate<br>metabolic<br>process<br>(GO:0009144) | 41 | 11 | 0.77 + | 14.2 | 2.37E-09 | 1.06E-07 |
|---------------------------------------------------------------------------|----|----|--------|------|----------|----------|

|                                                                       |    |    |        |       |          |          |
|-----------------------------------------------------------------------|----|----|--------|-------|----------|----------|
| nucleoside<br>triphosphate<br>biosynthetic<br>process<br>(GO:0009142) | 45 | 12 | 0.85 + | 14.11 | 4.67E-10 | 3.44E-08 |
|-----------------------------------------------------------------------|----|----|--------|-------|----------|----------|

|                                                                  |    |    |        |       |          |          |
|------------------------------------------------------------------|----|----|--------|-------|----------|----------|
| ribonucleoside triphosphate metabolic process<br>(GO:0009199)    | 42 | 11 | 0.79 + | 13.86 | 2.94E-09 | 1.22E-07 |
| ribonucleoside triphosphate biosynthetic process<br>(GO:0009201) | 42 | 11 | 0.79 + | 13.86 | 2.94E-09 | 1.19E-07 |
| ATP synthesis coupled electron transport<br>(GO:0042773)         | 23 | 6  | 0.43 + | 13.81 | 1.30E-05 | 3.11E-04 |
| nucleoside triphosphate metabolic process<br>(GO:0009141)        | 51 | 13 | 0.96 + | 13.49 | 1.41E-10 | 1.32E-08 |
| cell cycle DNA replication<br>(GO:0044786)                       | 16 | 4  | 0.3 +  | 13.23 | 4.46E-04 | 6.82E-03 |
| nuclear DNA replication<br>(GO:0033260)                          | 16 | 4  | 0.3 +  | 13.23 | 4.46E-04 | 6.77E-03 |
| proton transmembrane transport<br>(GO:1902600)                   | 49 | 12 | 0.93 + | 12.96 | 1.08E-09 | 6.53E-08 |
| oxidative phosphorylation<br>(GO:0006119)                        | 29 | 7  | 0.55 + | 12.77 | 3.75E-06 | 1.02E-04 |

|                                                            |    |    |        |       |          |          |
|------------------------------------------------------------|----|----|--------|-------|----------|----------|
| DNA replication initiation<br>(GO:0006270)                 | 17 | 4  | 0.32 + | 12.45 | 5.43E-04 | 8.12E-03 |
| respiratory electron transport chain<br>(GO:0022904)       | 31 | 7  | 0.59 + | 11.95 | 5.50E-06 | 1.44E-04 |
| electron transport chain<br>(GO:0022900)                   | 31 | 7  | 0.59 + | 11.95 | 5.50E-06 | 1.42E-04 |
| aerobic respiration<br>(GO:0009060)                        | 38 | 8  | 0.72 + | 11.14 | 1.84E-06 | 5.34E-05 |
| cellular respiration<br>(GO:0045333)                       | 57 | 12 | 1.08 + | 11.14 | 4.77E-09 | 1.86E-07 |
| ATP metabolic process<br>(GO:0046034)                      | 56 | 11 | 1.06 + | 10.4  | 3.93E-08 | 1.38E-06 |
| mitochondrial gene expression<br>(GO:0140053)              | 26 | 5  | 0.49 + | 10.18 | 2.44E-04 | 4.13E-03 |
| purine ribonucleotide biosynthetic process<br>(GO:0009152) | 74 | 14 | 1.4 +  | 10.01 | 8.38E-10 | 5.41E-08 |
| purine nucleotide biosynthetic process<br>(GO:0006164)     | 80 | 15 | 1.51 + | 9.92  | 2.32E-10 | 2.00E-08 |



|                                                                              |     |    |        |      |          |          |
|------------------------------------------------------------------------------|-----|----|--------|------|----------|----------|
| fatty acid<br>catabolic process<br>(GO:0009062)                              | 27  | 5  | 0.51 + | 9.8  | 2.85E-04 | 4.75E-03 |
| ribonucleotide<br>biosynthetic<br>process<br>(GO:0009260)                    | 78  | 14 | 1.47 + | 9.5  | 1.54E-09 | 7.73E-08 |
| purine-<br>containing<br>compound<br>biosynthetic<br>process<br>(GO:0072522) | 84  | 15 | 1.59 + | 9.45 | 4.23E-10 | 3.36E-08 |
| energy derivation<br>by oxidation of<br>organic<br>compounds<br>(GO:0015980) | 68  | 12 | 1.28 + | 9.34 | 2.71E-08 | 9.65E-07 |
| ribose phosphate<br>biosynthetic<br>process<br>(GO:0046390)                  | 83  | 14 | 1.57 + | 8.93 | 3.13E-09 | 1.24E-07 |
| nucleotide<br>biosynthetic<br>process<br>(GO:0009165)                        | 103 | 16 | 1.95 + | 8.22 | 6.84E-10 | 4.87E-08 |
| nucleoside<br>phosphate<br>biosynthetic<br>process<br>(GO:1901293)           | 104 | 16 | 1.97 + | 8.14 | 7.76E-10 | 5.34E-08 |

|                                                                |     |    |        |      |          |          |
|----------------------------------------------------------------|-----|----|--------|------|----------|----------|
| generation of precursor metabolites and energy<br>(GO:0006091) | 103 | 15 | 1.95 + | 7.71 | 5.16E-09 | 1.94E-07 |
| cellular amino acid metabolic process<br>(GO:0006520)          | 131 | 19 | 2.48 + | 7.68 | 4.89E-11 | 4.81E-09 |
| translational elongation<br>(GO:0006414)                       | 225 | 32 | 4.25 + | 7.53 | 1.66E-17 | 6.84E-15 |
| translation<br>(GO:0006412)                                    | 225 | 32 | 4.25 + | 7.53 | 1.66E-17 | 5.70E-15 |
| peptide biosynthetic process<br>(GO:0043043)                   | 228 | 32 | 4.31 + | 7.43 | 2.34E-17 | 6.90E-15 |
| purine nucleotide metabolic process<br>(GO:0006163)            | 133 | 18 | 2.51 + | 7.16 | 4.37E-10 | 3.34E-08 |
| purine ribonucleotide metabolic process<br>(GO:0009150)        | 126 | 17 | 2.38 + | 7.14 | 1.40E-09 | 7.60E-08 |
| amide biosynthetic process<br>(GO:0043604)                     | 259 | 34 | 4.89 + | 6.95 | 1.43E-17 | 7.38E-15 |
| ribonucleotide metabolic process<br>(GO:0009259)               | 131 | 17 | 2.48 + | 6.87 | 2.39E-09 | 1.05E-07 |

|                                                           |     |    |        |      |          |          |
|-----------------------------------------------------------|-----|----|--------|------|----------|----------|
| regulation of mRNA splicing, via spliceosome (GO:0048024) | 56  | 7  | 1.06 + | 6.62 | 1.62E-04 | 2.93E-03 |
| acyl-CoA metabolic process (GO:0006637)                   | 32  | 4  | 0.6 +  | 6.62 | 4.29E-03 | 4.74E-02 |
| purine-containing compound metabolic process (GO:0072521) | 145 | 18 | 2.74 + | 6.57 | 1.53E-09 | 7.90E-08 |
| ribose phosphate metabolic process (GO:0019693)           | 138 | 17 | 2.61 + | 6.52 | 4.87E-09 | 1.86E-07 |
| regulation of RNA splicing (GO:0043484)                   | 65  | 8  | 1.23 + | 6.51 | 6.12E-05 | 1.25E-03 |
| carboxylic acid catabolic process (GO:0046395)            | 74  | 9  | 1.4 +  | 6.44 | 2.32E-05 | 5.32E-04 |
| organic acid catabolic process (GO:0016054)               | 74  | 9  | 1.4 +  | 6.44 | 2.32E-05 | 5.26E-04 |
| tRNA metabolic process (GO:0006399)                       | 107 | 13 | 2.02 + | 6.43 | 3.68E-07 | 1.13E-05 |

|                                                                 |     |    |        |      |          |          |
|-----------------------------------------------------------------|-----|----|--------|------|----------|----------|
| nucleoside<br>phosphate<br>metabolic<br>process<br>(GO:0006753) | 165 | 20 | 3.12 + | 6.41 | 2.74E-10 | 2.26E-08 |
| peptide<br>metabolic<br>process<br>(GO:0006518)                 | 292 | 35 | 5.52 + | 6.34 | 6.11E-17 | 1.40E-14 |
| regulation of<br>mRNA processing<br>(GO:0050684)                | 67  | 8  | 1.27 + | 6.32 | 7.44E-05 | 1.43E-03 |
| nucleotide<br>metabolic<br>process<br>(GO:0009117)              | 160 | 19 | 3.02 + | 6.28 | 1.05E-09 | 6.58E-08 |
| cytoplasmic<br>translation<br>(GO:0002181)                      | 52  | 6  | 0.98 + | 6.11 | 7.03E-04 | 1.01E-02 |
| actin<br>polymerization or<br>depolymerization<br>(GO:0008154)  | 80  | 9  | 1.51 + | 5.95 | 4.07E-05 | 8.84E-04 |
| organophosphate<br>biosynthetic<br>process<br>(GO:0090407)      | 169 | 19 | 3.19 + | 5.95 | 2.41E-09 | 1.04E-07 |
| regulation of<br>actin filament<br>length<br>(GO:0030832)       | 74  | 8  | 1.4 +  | 5.72 | 1.40E-04 | 2.59E-03 |

|                                                                       |     |    |        |      |          |          |
|-----------------------------------------------------------------------|-----|----|--------|------|----------|----------|
| regulation of actin polymerization or depolymerization (GO:0008064)   | 74  | 8  | 1.4 +  | 5.72 | 1.40E-04 | 2.56E-03 |
| oxidation-reduction process (GO:0055114)                              | 185 | 20 | 3.5 +  | 5.72 | 1.69E-09 | 8.32E-08 |
| cellular amide metabolic process (GO:0043603)                         | 370 | 40 | 6.99 + | 5.72 | 8.81E-18 | 6.06E-15 |
| nucleobase-containing small molecule metabolic process (GO:0055086)   | 197 | 21 | 3.72 + | 5.64 | 8.33E-10 | 5.55E-08 |
| drug metabolic process (GO:0017144)                                   | 165 | 17 | 3.12 + | 5.45 | 5.44E-08 | 1.87E-06 |
| positive regulation of supramolecular fiber organization (GO:1902905) | 49  | 5  | 0.93 + | 5.4  | 3.21E-03 | 3.66E-02 |
| positive regulation of cytoskeleton organization (GO:0051495)         | 51  | 5  | 0.96 + | 5.19 | 3.76E-03 | 4.24E-02 |

|                                                          |     |    |        |      |          |          |
|----------------------------------------------------------|-----|----|--------|------|----------|----------|
| regulation of actin filament organization (GO:0110053)   | 82  | 8  | 1.55 + | 5.16 | 2.69E-04 | 4.51E-03 |
| regulation of actin filament polymerization (GO:0030833) | 72  | 7  | 1.36 + | 5.15 | 6.59E-04 | 9.64E-03 |
| carboxylic acid metabolic process (GO:0019752)           | 315 | 30 | 5.95 + | 5.04 | 2.58E-12 | 3.55E-10 |
| actin filament polymerization (GO:0030041)               | 75  | 7  | 1.42 + | 4.94 | 8.24E-04 | 1.16E-02 |
| regulation of mRNA metabolic process (GO:1903311)        | 87  | 8  | 1.64 + | 4.87 | 3.89E-04 | 6.12E-03 |
| fatty acid metabolic process (GO:0006631)                | 98  | 9  | 1.85 + | 4.86 | 1.71E-04 | 3.00E-03 |
| oxoacid metabolic process (GO:0043436)                   | 327 | 30 | 6.18 + | 4.86 | 6.14E-12 | 7.92E-10 |
| regulation of protein polymerization (GO:0032271)        | 77  | 7  | 1.45 + | 4.81 | 9.51E-04 | 1.31E-02 |
| organic acid metabolic process (GO:0006082)              | 331 | 30 | 6.25 + | 4.8  | 8.13E-12 | 9.88E-10 |

|                                                                       |     |    |         |      |          |          |
|-----------------------------------------------------------------------|-----|----|---------|------|----------|----------|
| small molecule<br>metabolic<br>process<br>(GO:0044281)                | 564 | 50 | 10.66 + | 4.69 | 1.22E-18 | 2.53E-15 |
| small molecule<br>catabolic process<br>(GO:0044282)                   | 113 | 10 | 2.14 +  | 4.68 | 1.00E-04 | 1.88E-03 |
| regulation of<br>supramolecular<br>fiber organization<br>(GO:1902903) | 93  | 8  | 1.76 +  | 4.55 | 5.87E-04 | 8.65E-03 |
| alpha-amino acid<br>metabolic<br>process<br>(GO:1901605)              | 82  | 7  | 1.55 +  | 4.52 | 1.34E-03 | 1.78E-02 |
| organonitrogen<br>compound<br>biosynthetic<br>process<br>(GO:1901566) | 602 | 51 | 11.38 + | 4.48 | 3.18E-18 | 3.28E-15 |
| mitochondrial<br>transport<br>(GO:0006839)                            | 72  | 6  | 1.36 +  | 4.41 | 3.27E-03 | 3.71E-02 |
| regulation of<br>protein complex<br>assembly<br>(GO:0043254)          | 97  | 8  | 1.83 +  | 4.36 | 7.60E-04 | 1.09E-02 |
| mRNA splicing,<br>via spliceosome<br>(GO:0000398)                     | 156 | 12 | 2.95 +  | 4.07 | 7.36E-05 | 1.46E-03 |

|                                                                                                   |     |    |        |      |          |          |
|---------------------------------------------------------------------------------------------------|-----|----|--------|------|----------|----------|
| RNA splicing, via transesterification reactions with bulged adenosine as nucleophile (GO:0000377) | 156 | 12 | 2.95 + | 4.07 | 7.36E-05 | 1.45E-03 |
| RNA splicing, via transesterification reactions (GO:0000375)                                      | 156 | 12 | 2.95 + | 4.07 | 7.36E-05 | 1.43E-03 |
| protein polymerization (GO:0051258)                                                               | 91  | 7  | 1.72 + | 4.07 | 2.33E-03 | 2.81E-02 |
| protein-DNA complex assembly (GO:0065004)                                                         | 91  | 7  | 1.72 + | 4.07 | 2.33E-03 | 2.80E-02 |
| ncRNA metabolic process (GO:0034660)                                                              | 260 | 20 | 4.91 + | 4.07 | 3.16E-07 | 9.89E-06 |
| regulation of cellular component size (GO:0032535)                                                | 107 | 8  | 2.02 + | 3.96 | 1.37E-03 | 1.82E-02 |
| cellular protein-containing complex assembly (GO:0034622)                                         | 391 | 29 | 7.39 + | 3.93 | 1.46E-09 | 7.75E-08 |



|                                                            |     |    |        |      |          |          |
|------------------------------------------------------------|-----|----|--------|------|----------|----------|
| regulation of actin cytoskeleton organization (GO:0032956) | 108 | 8  | 2.04 + | 3.92 | 1.45E-03 | 1.89E-02 |
| regulation of actin filament-based process (GO:0032970)    | 109 | 8  | 2.06 + | 3.88 | 1.53E-03 | 1.97E-02 |
| regulation of cytoskeleton organization (GO:0051493)       | 150 | 11 | 2.83 + | 3.88 | 2.16E-04 | 3.71E-03 |
| protein folding (GO:0006457)                               | 96  | 7  | 1.81 + | 3.86 | 3.09E-03 | 3.54E-02 |
| RNA splicing (GO:0008380)                                  | 179 | 13 | 3.38 + | 3.84 | 6.46E-05 | 1.31E-03 |
| organophosphate metabolic process (GO:0019637)             | 310 | 22 | 5.86 + | 3.76 | 2.97E-07 | 9.58E-06 |
| ribonucleoprotein complex assembly (GO:0022618)            | 113 | 8  | 2.14 + | 3.75 | 1.90E-03 | 2.38E-02 |
| protein-containing complex assembly (GO:0065003)           | 420 | 29 | 7.94 + | 3.65 | 6.63E-09 | 2.45E-07 |
| protein-DNA complex subunit organization (GO:0071824)      | 116 | 8  | 2.19 + | 3.65 | 2.22E-03 | 2.71E-02 |

|                                                              |     |    |        |      |          |          |
|--------------------------------------------------------------|-----|----|--------|------|----------|----------|
| ribonucleoprotein complex subunit organization (GO:0071826)  | 118 | 8  | 2.23 + | 3.59 | 2.45E-03 | 2.92E-02 |
| regulation of anatomical structure size (GO:0090066)         | 119 | 8  | 2.25 + | 3.56 | 2.57E-03 | 3.02E-02 |
| protein-containing complex subunit organization (GO:0043933) | 511 | 33 | 9.66 + | 3.42 | 2.80E-09 | 1.18E-07 |
| monocarboxylic acid metabolic process (GO:0032787)           | 155 | 10 | 2.93 + | 3.41 | 1.05E-03 | 1.44E-02 |
| mRNA processing (GO:0006397)                                 | 206 | 13 | 3.89 + | 3.34 | 2.41E-04 | 4.10E-03 |
| regulation of cellular component biogenesis (GO:0044087)     | 144 | 9  | 2.72 + | 3.31 | 2.27E-03 | 2.75E-02 |
| ribosome biogenesis (GO:0042254)                             | 177 | 11 | 3.34 + | 3.29 | 8.03E-04 | 1.14E-02 |
| actin filament organization (GO:0007015)                     | 161 | 10 | 3.04 + | 3.29 | 1.38E-03 | 1.81E-02 |

|                                                           |     |    |        |      |          |          |
|-----------------------------------------------------------|-----|----|--------|------|----------|----------|
| small molecule biosynthetic process (GO:0044283)          | 162 | 10 | 3.06 + | 3.27 | 1.44E-03 | 1.88E-02 |
| carbohydrate derivative biosynthetic process (GO:1901137) | 244 | 15 | 4.61 + | 3.25 | 1.07E-04 | 2.00E-03 |
| monovalent inorganic cation transport (GO:0015672)        | 202 | 12 | 3.82 + | 3.14 | 6.87E-04 | 9.99E-03 |
| ribonucleoprotein complex biogenesis (GO:0022613)         | 240 | 14 | 4.54 + | 3.09 | 3.01E-04 | 4.82E-03 |
| mRNA metabolic process (GO:0016071)                       | 269 | 15 | 5.08 + | 2.95 | 2.93E-04 | 4.83E-03 |
| supramolecular fiber organization (GO:0097435)            | 238 | 13 | 4.5 +  | 2.89 | 8.74E-04 | 1.21E-02 |
| RNA processing (GO:0006396)                               | 433 | 23 | 8.18 + | 2.81 | 1.61E-05 | 3.77E-04 |
| organonitrogen compound catabolic process (GO:1901565)    | 439 | 23 | 8.3 +  | 2.77 | 1.98E-05 | 4.58E-04 |

|                                                                                     |     |    |         |      |          |          |
|-------------------------------------------------------------------------------------|-----|----|---------|------|----------|----------|
| carbohydrate<br>derivative<br>metabolic<br>process<br>(GO:1901135)                  | 377 | 19 | 7.12 +  | 2.67 | 1.67E-04 | 3.00E-03 |
| organic<br>substance<br>catabolic process<br>(GO:1901575)                           | 678 | 34 | 12.81 + | 2.65 | 5.23E-07 | 1.59E-05 |
| cellular<br>macromolecule<br>catabolic process<br>(GO:0044265)                      | 410 | 20 | 7.75 +  | 2.58 | 1.71E-04 | 3.02E-03 |
| proteolysis<br>involved in<br>cellular protein<br>catabolic process<br>(GO:0051603) | 308 | 15 | 5.82 +  | 2.58 | 1.10E-03 | 1.50E-02 |
| cellular protein<br>catabolic process<br>(GO:0044257)                               | 310 | 15 | 5.86 +  | 2.56 | 1.17E-03 | 1.58E-02 |
| protein catabolic<br>process<br>(GO:0030163)                                        | 333 | 16 | 6.29 +  | 2.54 | 8.74E-04 | 1.22E-02 |
| macromolecule<br>catabolic process<br>(GO:0009057)                                  | 442 | 21 | 8.35 +  | 2.51 | 1.67E-04 | 2.98E-03 |
| inorganic cation<br>transmembrane<br>transport<br>(GO:0098662)                      | 274 | 13 | 5.18 +  | 2.51 | 2.87E-03 | 3.31E-02 |

|                                                              |      |    |         |      |          |          |
|--------------------------------------------------------------|------|----|---------|------|----------|----------|
| cellular catabolic process<br>(GO:0044248)                   | 723  | 34 | 13.66 + | 2.49 | 2.60E-06 | 7.25E-05 |
| cation transmembrane transport<br>(GO:0098655)               | 302  | 14 | 5.71 +  | 2.45 | 2.46E-03 | 2.92E-02 |
| inorganic ion transmembrane transport<br>(GO:0098660)        | 305  | 14 | 5.76 +  | 2.43 | 2.68E-03 | 3.13E-02 |
| catabolic process<br>(GO:0009056)                            | 828  | 35 | 15.65 + | 2.24 | 1.47E-05 | 3.49E-04 |
| cellular component biogenesis<br>(GO:0044085)                | 937  | 39 | 17.71 + | 2.2  | 7.55E-06 | 1.88E-04 |
| cellular component assembly<br>(GO:0022607)                  | 806  | 33 | 15.23 + | 2.17 | 6.05E-05 | 1.25E-03 |
| organonitrogen compound metabolic process<br>(GO:1901564)    | 2386 | 97 | 45.09 + | 2.15 | 5.48E-13 | 1.03E-10 |
| cellular nitrogen compound metabolic process<br>(GO:0034641) | 2406 | 96 | 45.46 + | 2.11 | 2.24E-12 | 3.56E-10 |

|                                                                          |      |     |         |      |          |          |
|--------------------------------------------------------------------------|------|-----|---------|------|----------|----------|
| cellular nitrogen<br>compound<br>biosynthetic<br>process<br>(GO:0044271) | 1633 | 62  | 30.86 + | 2.01 | 2.52E-07 | 8.25E-06 |
| cellular protein<br>metabolic<br>process<br>(GO:0044267)                 | 1679 | 62  | 31.73 + | 1.95 | 6.14E-07 | 1.84E-05 |
| cellular<br>biosynthetic<br>process<br>(GO:0044249)                      | 1957 | 71  | 36.98 + | 1.92 | 1.43E-07 | 4.84E-06 |
| cellular metabolic<br>process<br>(GO:0044237)                            | 4268 | 154 | 80.65 + | 1.91 | 6.08E-17 | 1.57E-14 |
| organic<br>substance<br>biosynthetic<br>process<br>(GO:1901576)          | 1976 | 71  | 37.34 + | 1.9  | 2.46E-07 | 8.18E-06 |
| biosynthetic<br>process<br>(GO:0009058)                                  | 1997 | 71  | 37.74 + | 1.88 | 3.03E-07 | 9.63E-06 |
| metabolic<br>process<br>(GO:0008152)                                     | 4633 | 156 | 87.55 + | 1.78 | 1.79E-14 | 3.69E-12 |
| heterocycle<br>metabolic<br>process<br>(GO:0046483)                      | 2151 | 72  | 40.65 + | 1.77 | 2.55E-06 | 7.21E-05 |
| primary<br>metabolic<br>process<br>(GO:0044238)                          | 4250 | 142 | 80.31 + | 1.77 | 1.49E-12 | 2.57E-10 |

|                                                                               |      |     |         |      |          |          |
|-------------------------------------------------------------------------------|------|-----|---------|------|----------|----------|
| nucleobase-<br>containing<br>compound<br>metabolic<br>process<br>(GO:0006139) | 2110 | 70  | 39.87 + | 1.76 | 4.83E-06 | 1.28E-04 |
| nitrogen<br>compound<br>metabolic<br>process<br>(GO:0006807)                  | 4049 | 134 | 76.51 + | 1.75 | 1.59E-11 | 1.64E-09 |
| organic cyclic<br>compound<br>metabolic<br>process<br>(GO:1901360)            | 2207 | 73  | 41.7 +  | 1.75 | 3.32E-06 | 9.12E-05 |
| cellular aromatic<br>compound<br>metabolic<br>process<br>(GO:0006725)         | 2162 | 71  | 40.85 + | 1.74 | 6.07E-06 | 1.55E-04 |
| organic<br>substance<br>metabolic<br>process<br>(GO:0071704)                  | 4460 | 146 | 84.28 + | 1.73 | 2.42E-12 | 3.57E-10 |
| gene expression<br>(GO:0010467)                                               | 1925 | 62  | 36.37 + | 1.7  | 5.00E-05 | 1.05E-03 |
| protein metabolic<br>process<br>(GO:0019538)                                  | 1981 | 62  | 37.43 + | 1.66 | 9.58E-05 | 1.81E-03 |
| cellular<br>macromolecule<br>metabolic<br>process<br>(GO:0044260)             | 3069 | 84  | 57.99 + | 1.45 | 5.61E-04 | 8.34E-03 |

|                                                                           |       |     |          |      |          |          |
|---------------------------------------------------------------------------|-------|-----|----------|------|----------|----------|
| macromolecule<br>metabolic<br>process<br>(GO:0043170)                     | 3732  | 99  | 70.52 +  | 1.4  | 4.32E-04 | 6.65E-03 |
| cellular process<br>(GO:0009987)                                          | 7481  | 197 | 141.36 + | 1.39 | 1.63E-08 | 5.89E-07 |
| biological_proces<br>s (GO:0008150)                                       | 8857  | 209 | 167.36 + | 1.25 | 3.00E-05 | 6.73E-04 |
| Unclassified<br>(UNCLASSIFIED)                                            | 11994 | 185 | 226.64 - | 0.82 | 3.00E-05 | 6.66E-04 |
| biological<br>regulation<br>(GO:0065007)                                  | 4469  | 52  | 84.45 -  | 0.62 | 3.85E-05 | 8.45E-04 |
| regulation of<br>biological process<br>(GO:0050789)                       | 4002  | 42  | 75.62 -  | 0.56 | 6.96E-06 | 1.75E-04 |
| regulation of<br>cellular process<br>(GO:0050794)                         | 3779  | 37  | 71.41 -  | 0.52 | 2.18E-06 | 6.25E-05 |
| regulation of<br>macromolecule<br>biosynthetic<br>process<br>(GO:0010556) | 1194  | 10  | 22.56 -  | 0.44 | 4.06E-03 | 4.55E-02 |
| regulation of<br>cellular<br>biosynthetic<br>process<br>(GO:0031326)      | 1205  | 10  | 22.77 -  | 0.44 | 4.11E-03 | 4.58E-02 |



|                                                            |      |    |         |      |          |          |
|------------------------------------------------------------|------|----|---------|------|----------|----------|
| regulation of biosynthetic process<br>(GO:0009889)         | 1211 | 10 | 22.88 - | 0.44 | 4.16E-03 | 4.62E-02 |
| cellular response to stimulus<br>(GO:0051716)              | 2360 | 19 | 44.59 - | 0.43 | 1.13E-05 | 2.75E-04 |
| response to stimulus<br>(GO:0050896)                       | 2802 | 22 | 52.95 - | 0.42 | 8.74E-07 | 2.58E-05 |
| RNA biosynthetic process<br>(GO:0032774)                   | 1139 | 8  | 21.52 - | 0.37 | 1.46E-03 | 1.88E-02 |
| multicellular organismal process<br>(GO:0032501)           | 1174 | 8  | 22.18 - | 0.36 | 7.93E-04 | 1.13E-02 |
| nucleic acid-templated transcription<br>(GO:0097659)       | 1132 | 7  | 21.39 - | 0.33 | 4.26E-04 | 6.66E-03 |
| transcription, DNA-templated<br>(GO:0006351)               | 1132 | 7  | 21.39 - | 0.33 | 4.26E-04 | 6.61E-03 |
| regulation of transcription, DNA-templated<br>(GO:0006355) | 1081 | 6  | 20.43 - | 0.29 | 2.97E-04 | 4.87E-03 |

|                                                                 |      |   |         |      |          |          |
|-----------------------------------------------------------------|------|---|---------|------|----------|----------|
| regulation of nucleic acid-templated transcription (GO:1903506) | 1081 | 6 | 20.43 - | 0.29 | 2.97E-04 | 4.83E-03 |
| regulation of RNA biosynthetic process (GO:2001141)             | 1081 | 6 | 20.43 - | 0.29 | 2.97E-04 | 4.79E-03 |
| regulation of transcription by RNA polymerase II (GO:0006357)   | 772  | 4 | 14.59 - | 0.27 | 2.48E-03 | 2.92E-02 |
| transcription by RNA polymerase II (GO:0006366)                 | 808  | 4 | 15.27 - | 0.26 | 1.26E-03 | 1.69E-02 |
| regulation of cell communication (GO:0010646)                   | 685  | 3 | 12.94 - | 0.23 | 2.19E-03 | 2.70E-02 |
| regulation of signaling (GO:0023051)                            | 687  | 3 | 12.98 - | 0.23 | 2.20E-03 | 2.71E-02 |
| regulation of response to stimulus (GO:0048583)                 | 893  | 3 | 16.87 - | 0.18 | 6.85E-05 | 1.37E-03 |
| signal transduction (GO:0007165)                                | 1887 | 5 | 35.66 - | 0.14 | 1.49E-10 | 1.34E-08 |

|                                                           |      |   |         |        |          |          |
|-----------------------------------------------------------|------|---|---------|--------|----------|----------|
| intracellular signal transduction (GO:0035556)            | 800  | 2 | 15.12 - | 0.13   | 7.52E-05 | 1.44E-03 |
| signaling (GO:0023052)                                    | 2027 | 5 | 38.3 -  | 0.13   | 9.11E-12 | 1.04E-09 |
| cell communication (GO:0007154)                           | 2031 | 5 | 38.38 - | 0.13   | 9.13E-12 | 9.92E-10 |
| positive regulation of response to stimulus (GO:0048584)  | 469  | 1 | 8.86 -  | 0.11   | 2.72E-03 | 3.15E-02 |
| cell surface receptor signaling pathway (GO:0007166)      | 829  | 1 | 15.66 - | 0.06   | 4.53E-06 | 1.22E-04 |
| cell-cell signaling (GO:0007267)                          | 381  | 0 | 7.2 -   | < 0.01 | 1.57E-03 | 2.00E-02 |
| immune system process (GO:0002376)                        | 556  | 0 | 10.51 - | < 0.01 | 4.33E-05 | 9.30E-04 |
| G protein-coupled receptor signaling pathway (GO:0007186) | 453  | 0 | 8.56 -  | < 0.01 | 3.13E-04 | 4.97E-03 |
| immune response (GO:0006955)                              | 449  | 0 | 8.48 -  | < 0.01 | 5.05E-04 | 7.61E-03 |

(FDR)

Analysis Type: PANTHER Overrepresentation Test (Released 20200728)

Annotation  
Version and Release Date: PANTHER version 15.0 Released 2020-02-14

Analyzed List: protein.txt (Homo sapiens)

Reference List: Homo sapiens (all genes in database)

Test Type: FISHER

Correction: FDR

PANTHER GO-Slim Cellular Component Homo sap protein.txt protein.txt protein.txt protein.txt protein.txt protein.txt (FDR)

|                                                          |   |   |        |       |          |          |
|----------------------------------------------------------|---|---|--------|-------|----------|----------|
| mitochondrial respiratory chain complex III (GO:0005750) | 5 | 2 | 0.09 + | 21.17 | 6.77E-03 | 4.14E-02 |
|----------------------------------------------------------|---|---|--------|-------|----------|----------|

|                                                             |   |   |        |       |          |          |
|-------------------------------------------------------------|---|---|--------|-------|----------|----------|
| proteasome core complex, alpha-subunit complex (GO:0019773) | 8 | 3 | 0.15 + | 19.85 | 9.35E-04 | 7.84E-03 |
|-------------------------------------------------------------|---|---|--------|-------|----------|----------|

|                                                                     |    |   |        |       |          |          |
|---------------------------------------------------------------------|----|---|--------|-------|----------|----------|
| mitochondrial proton-transporting ATP synthase complex (GO:0005753) | 11 | 4 | 0.21 + | 19.24 | 1.35E-04 | 1.50E-03 |
|---------------------------------------------------------------------|----|---|--------|-------|----------|----------|

|                                                                    |    |    |        |       |          |          |
|--------------------------------------------------------------------|----|----|--------|-------|----------|----------|
| mitochondrial<br>small<br>ribosomal<br>subunit<br>(GO:0005763)     | 12 | 4  | 0.23 + | 17.64 | 1.78E-04 | 1.81E-03 |
| proton-<br>transporting<br>ATP synthase<br>complex<br>(GO:0045259) | 12 | 4  | 0.23 + | 17.64 | 1.78E-04 | 1.78E-03 |
| Arp2/3 protein<br>complex<br>(GO:0005885)                          | 10 | 3  | 0.19 + | 15.88 | 1.58E-03 | 1.28E-02 |
| chaperonin-<br>containing T-<br>complex<br>(GO:0005832)            | 12 | 3  | 0.23 + | 13.23 | 2.44E-03 | 1.84E-02 |
| small<br>ribosomal<br>subunit<br>(GO:0015935)                      | 55 | 12 | 1.04 + | 11.55 | 3.35E-09 | 8.72E-08 |
| proteasome<br>accessory<br>complex<br>(GO:0022624)                 | 16 | 3  | 0.3 +  | 9.92  | 4.92E-03 | 3.28E-02 |
| proteasome<br>regulatory<br>particle<br>(GO:0005838)               | 16 | 3  | 0.3 +  | 9.92  | 4.92E-03 | 3.24E-02 |
| cytosolic large<br>ribosomal<br>subunit<br>(GO:0022625)            | 54 | 10 | 1.02 + | 9.8   | 2.67E-07 | 4.95E-06 |
| cytosolic<br>ribosome<br>(GO:0022626)                              | 94 | 17 | 1.78 + | 9.57  | 2.40E-11 | 1.13E-09 |

|                                                                  |     |    |        |      |          |          |
|------------------------------------------------------------------|-----|----|--------|------|----------|----------|
| cytosolic small ribosomal subunit (GO:0022627)                   | 40  | 7  | 0.76 + | 9.26 | 2.37E-05 | 3.09E-04 |
| ribosomal subunit (GO:0044391)                                   | 132 | 22 | 2.49 + | 8.82 | 1.17E-13 | 8.67E-12 |
| ribosome (GO:0005840)                                            | 140 | 23 | 2.65 + | 8.69 | 4.19E-14 | 3.63E-12 |
| mitochondrial protein complex (GO:0098798)                       | 129 | 21 | 2.44 + | 8.62 | 6.39E-13 | 4.15E-11 |
| integral component of mitochondrial inner membrane (GO:0031305)  | 25  | 4  | 0.47 + | 8.47 | 1.92E-03 | 1.53E-02 |
| intrinsic component of mitochondrial inner membrane (GO:0031304) | 25  | 4  | 0.47 + | 8.47 | 1.92E-03 | 1.51E-02 |
| inner mitochondrial membrane protein complex (GO:0098800)        | 75  | 12 | 1.42 + | 8.47 | 7.10E-08 | 1.48E-06 |
| mitochondrial respiratory chain complex I (GO:0005747)           | 25  | 4  | 0.47 + | 8.47 | 1.92E-03 | 1.49E-02 |

|                                                               |    |   |        |      |          |          |
|---------------------------------------------------------------|----|---|--------|------|----------|----------|
| oxidoreductase complex<br>(GO:1990204)                        | 45 | 7 | 0.85 + | 8.23 | 4.66E-05 | 5.77E-04 |
| mitochondrial respirasome<br>(GO:0005746)                     | 45 | 7 | 0.85 + | 8.23 | 4.66E-05 | 5.64E-04 |
| endopeptidase complex<br>(GO:1905369)                         | 39 | 6 | 0.74 + | 8.14 | 1.73E-04 | 1.88E-03 |
| cortical actin cytoskeleton<br>(GO:0030864)                   | 39 | 6 | 0.74 + | 8.14 | 1.73E-04 | 1.84E-03 |
| proton-transporting two-sector ATPase complex<br>(GO:0016469) | 26 | 4 | 0.49 + | 8.14 | 2.18E-03 | 1.67E-02 |
| proteasome complex<br>(GO:0000502)                            | 39 | 6 | 0.74 + | 8.14 | 1.73E-04 | 1.80E-03 |
| respiratory chain complex I<br>(GO:0045271)                   | 27 | 4 | 0.51 + | 7.84 | 2.47E-03 | 1.83E-02 |
| NADH dehydrogenase complex<br>(GO:0030964)                    | 28 | 4 | 0.53 + | 7.56 | 2.78E-03 | 2.01E-02 |
| respirasome<br>(GO:0070469)                                   | 50 | 7 | 0.94 + | 7.41 | 8.51E-05 | 1.01E-03 |
| cortical cytoskeleton<br>(GO:0030863)                         | 43 | 6 | 0.81 + | 7.38 | 2.79E-04 | 2.74E-03 |



|                                                           |     |    |        |      |          |          |
|-----------------------------------------------------------|-----|----|--------|------|----------|----------|
| mitochondrial inner membrane (GO:0005743)                 | 129 | 18 | 2.44 + | 7.38 | 2.80E-10 | 8.56E-09 |
| respiratory chain complex (GO:0098803)                    | 45  | 6  | 0.85 + | 7.06 | 3.49E-04 | 3.24E-03 |
| mitochondrial membrane part (GO:0044455)                  | 114 | 15 | 2.15 + | 6.96 | 1.77E-08 | 4.19E-07 |
| large ribosomal subunit (GO:0015934)                      | 77  | 10 | 1.45 + | 6.87 | 4.82E-06 | 6.97E-05 |
| cytosolic part (GO:0044445)                               | 156 | 20 | 2.95 + | 6.78 | 1.11E-10 | 3.85E-09 |
| organelle inner membrane (GO:0019866)                     | 143 | 18 | 2.7 +  | 6.66 | 1.25E-09 | 3.43E-08 |
| MCM core complex (GO:0097373)                             | 33  | 4  | 0.62 + | 6.41 | 4.75E-03 | 3.25E-02 |
| MCM complex (GO:0042555)                                  | 33  | 4  | 0.62 + | 6.41 | 4.75E-03 | 3.20E-02 |
| organellar ribosome (GO:0000313)                          | 35  | 4  | 0.66 + | 6.05 | 5.74E-03 | 3.64E-02 |
| integral component of mitochondrial membrane (GO:0032592) | 35  | 4  | 0.66 + | 6.05 | 5.74E-03 | 3.60E-02 |

|                                                            |     |    |        |      |          |          |
|------------------------------------------------------------|-----|----|--------|------|----------|----------|
| mitochondrial ribosome (GO:0005761)                        | 35  | 4  | 0.66 + | 6.05 | 5.74E-03 | 3.55E-02 |
| mitochondrial matrix (GO:0005759)                          | 62  | 7  | 1.17 + | 5.97 | 2.87E-04 | 2.71E-03 |
| mitochondrion (GO:0005739)                                 | 470 | 53 | 8.88 + | 5.97 | 4.35E-24 | 1.13E-21 |
| intrinsic component of mitochondrial membrane (GO:0098573) | 37  | 4  | 0.7 +  | 5.72 | 6.87E-03 | 4.15E-02 |
| peptidase complex (GO:1905368)                             | 56  | 6  | 1.06 + | 5.67 | 1.00E-03 | 8.28E-03 |
| mitochondrial part (GO:0044429)                            | 249 | 25 | 4.71 + | 5.31 | 6.45E-11 | 2.40E-09 |
| mitochondrial membrane (GO:0031966)                        | 180 | 18 | 3.4 +  | 5.29 | 3.36E-08 | 7.59E-07 |
| mitochondrial envelope (GO:0005740)                        | 193 | 18 | 3.65 + | 4.94 | 8.91E-08 | 1.78E-06 |
| cell cortex part (GO:0044448)                              | 91  | 8  | 1.72 + | 4.65 | 5.13E-04 | 4.60E-03 |
| spliceosomal snRNP complex (GO:0097525)                    | 76  | 6  | 1.44 + | 4.18 | 4.19E-03 | 2.95E-02 |

|                                                              |      |     |         |      |          |          |
|--------------------------------------------------------------|------|-----|---------|------|----------|----------|
| ribonucleoprotein complex<br>(GO:1990904)                    | 457  | 36  | 8.64 +  | 4.17 | 2.79E-12 | 1.61E-10 |
| small nuclear ribonucleoprotein complex<br>(GO:0030532)      | 77   | 6   | 1.45 +  | 4.12 | 4.45E-03 | 3.09E-02 |
| Sm-like protein family complex<br>(GO:0120114)               | 80   | 6   | 1.51 +  | 3.97 | 5.30E-03 | 3.40E-02 |
| cell cortex<br>(GO:0005938)                                  | 122  | 9   | 2.31 +  | 3.9  | 7.67E-04 | 6.54E-03 |
| envelope<br>(GO:0031975)                                     | 296  | 20  | 5.59 +  | 3.58 | 2.10E-06 | 3.41E-05 |
| organelle envelope<br>(GO:0031967)                           | 296  | 20  | 5.59 +  | 3.58 | 2.10E-06 | 3.30E-05 |
| cytosol<br>(GO:0005829)                                      | 710  | 45  | 13.42 + | 3.35 | 5.40E-12 | 2.81E-10 |
| actin cytoskeleton<br>(GO:0015629)                           | 163  | 9   | 3.08 +  | 2.92 | 4.92E-03 | 3.20E-02 |
| cytoplasmic part<br>(GO:0044444)                             | 2913 | 125 | 55.04 + | 2.27 | 8.10E-19 | 8.43E-17 |
| cytoplasm<br>(GO:0005737)                                    | 4104 | 168 | 77.55 + | 2.17 | 1.33E-24 | 6.89E-22 |
| intracellular non-membrane-bounded organelle<br>(GO:0043232) | 1284 | 49  | 24.26 + | 2.02 | 4.62E-06 | 7.07E-05 |

|                                                       |      |     |          |      |          |          |
|-------------------------------------------------------|------|-----|----------|------|----------|----------|
| non-membrane-bounded organelle (GO:0043228)           | 1284 | 49  | 24.26 +  | 2.02 | 4.62E-06 | 6.87E-05 |
| protein-containing complex (GO:0032991)               | 2713 | 94  | 51.26 +  | 1.83 | 7.26E-09 | 1.80E-07 |
| intracellular organelle part (GO:0044446)             | 2610 | 89  | 49.32 +  | 1.8  | 4.15E-08 | 9.00E-07 |
| organelle part (GO:0044422)                           | 2695 | 90  | 50.92 +  | 1.77 | 9.54E-08 | 1.84E-06 |
| intracellular (GO:0005622)                            | 6661 | 215 | 125.87 + | 1.71 | 6.14E-20 | 1.06E-17 |
| intracellular part (GO:0044424)                       | 6630 | 213 | 125.28 + | 1.7  | 2.62E-19 | 3.41E-17 |
| intracellular organelle (GO:0043229)                  | 5308 | 159 | 100.3 +  | 1.59 | 1.55E-10 | 5.04E-09 |
| organelle (GO:0043226)                                | 5421 | 159 | 102.44 + | 1.55 | 9.13E-10 | 2.64E-08 |
| intracellular membrane-bounded organelle (GO:0043231) | 4649 | 127 | 87.85 +  | 1.45 | 7.78E-06 | 1.09E-04 |
| membrane-bounded organelle (GO:0043227)               | 4717 | 127 | 89.13 +  | 1.42 | 1.53E-05 | 2.10E-04 |
| cell part (GO:0044464)                                | 8223 | 221 | 155.38 + | 1.42 | 4.13E-11 | 1.79E-09 |

|                                                       |       |     |          |      |          |          |
|-------------------------------------------------------|-------|-----|----------|------|----------|----------|
| cell<br>(GO:0005623)                                  | 8223  | 221 | 155.38 + | 1.42 | 4.13E-11 | 1.65E-09 |
| cellular_compo<br>nent<br>(GO:0005575)                | 9090  | 223 | 171.76 + | 1.3  | 3.42E-07 | 6.13E-06 |
| Unclassified<br>(UNCLASSIFIED)                        | 11761 | 171 | 222.24 - | 0.77 | 3.42E-07 | 5.92E-06 |
| membrane<br>(GO:0016020)                              | 3445  | 44  | 65.1 -   | 0.68 | 3.85E-03 | 2.74E-02 |
| cell periphery<br>(GO:0071944)                        | 3175  | 31  | 59.99 -  | 0.52 | 1.80E-05 | 2.40E-04 |
| plasma<br>membrane<br>(GO:0005886)                    | 3105  | 26  | 58.67 -  | 0.44 | 6.10E-07 | 1.02E-05 |
| extracellular<br>space<br>(GO:0005615)                | 850   | 5   | 16.06 -  | 0.31 | 2.59E-03 | 1.90E-02 |
| plasma<br>membrane<br>part<br>(GO:0044459)            | 1404  | 8   | 26.53 -  | 0.3  | 3.58E-05 | 4.54E-04 |
| extracellular<br>region<br>(GO:0005576)               | 937   | 5   | 17.71 -  | 0.28 | 7.29E-04 | 6.42E-03 |
| extracellular<br>region part<br>(GO:0044421)          | 937   | 5   | 17.71 -  | 0.28 | 7.29E-04 | 6.31E-03 |
| integral<br>component of<br>membrane<br>(GO:0016021)  | 986   | 5   | 18.63 -  | 0.27 | 3.88E-04 | 3.54E-03 |
| intrinsic<br>component of<br>membrane<br>(GO:0031224) | 1012  | 5   | 19.12 -  | 0.26 | 2.85E-04 | 2.74E-03 |

|                                                                |     |   |         |      |          |          |
|----------------------------------------------------------------|-----|---|---------|------|----------|----------|
| integral<br>component of<br>plasma<br>membrane<br>(GO:0005887) | 652 | 1 | 12.32 - | 0.08 | 9.40E-05 | 1.09E-03 |
|----------------------------------------------------------------|-----|---|---------|------|----------|----------|

|                                                                 |     |   |         |      |          |          |
|-----------------------------------------------------------------|-----|---|---------|------|----------|----------|
| intrinsic<br>component of<br>plasma<br>membrane<br>(GO:0031226) | 660 | 1 | 12.47 - | 0.08 | 9.57E-05 | 1.08E-03 |
|-----------------------------------------------------------------|-----|---|---------|------|----------|----------|

Analysis Type: PANTHER Overrepresentation Test (Released 20200728)

Annotation Version and Release Date: PANTHER version 15.0 Released 2020-02-14

Analyzed List: protein.txt (Homo sapiens)

Reference List: Homo sapiens (all genes in database)

Test Type: FISHER

Correction: FDR

PANTHER GO-Slim Molecular Function Homo sap protein.txt protein.txt protein.txt protein.txt protein.txt protein.txt (FDR)

|                                                                              |    |   |        |       |          |          |
|------------------------------------------------------------------------------|----|---|--------|-------|----------|----------|
| proton-transporting ATP synthase activity, rotational mechanism (GO:0046933) | 9  | 4 | 0.17 + | 23.52 | 7.30E-05 | 1.76E-03 |
| pre-mRNA binding (GO:0036002)                                                | 14 | 4 | 0.26 + | 15.12 | 2.90E-04 | 5.51E-03 |
| magnesium ion binding (GO:0000287)                                           | 11 | 3 | 0.21 + | 14.43 | 1.98E-03 | 2.24E-02 |
| 3'-5' DNA helicase activity (GO:0043138)                                     | 17 | 4 | 0.32 + | 12.45 | 5.43E-04 | 8.25E-03 |

|                                                   |     |    |        |       |          |          |
|---------------------------------------------------|-----|----|--------|-------|----------|----------|
| DNA replication origin binding (GO:0003688)       | 18  | 4  | 0.34 + | 11.76 | 6.54E-04 | 9.66E-03 |
| electron transfer activity (GO:0009055)           | 24  | 5  | 0.45 + | 11.03 | 1.76E-04 | 3.74E-03 |
| structural constituent of ribosome (GO:0003735)   | 119 | 23 | 2.25 + | 10.23 | 1.94E-15 | 5.17E-13 |
| hydrolyase activity (GO:0016836)                  | 28  | 5  | 0.53 + | 9.45  | 3.31E-04 | 5.87E-03 |
| carbon-oxygen lyase activity (GO:0016835)         | 28  | 5  | 0.53 + | 9.45  | 3.31E-04 | 5.68E-03 |
| endoribonuclease activity (GO:0004521)            | 34  | 6  | 0.64 + | 9.34  | 8.82E-05 | 2.04E-03 |
| ribonucleoprotein complex binding (GO:0043021)    | 42  | 7  | 0.79 + | 8.82  | 3.14E-05 | 8.35E-04 |
| single-stranded RNA binding (GO:0003727)          | 31  | 5  | 0.59 + | 8.54  | 5.02E-04 | 7.86E-03 |
| ligase activity (GO:0016874)                      | 93  | 15 | 1.76 + | 8.54  | 1.48E-09 | 9.84E-08 |
| catalytic activity, acting on a tRNA (GO:0140101) | 86  | 13 | 1.63 + | 8     | 3.69E-08 | 1.96E-06 |



|                                                                                                    |     |    |        |      |          |          |
|----------------------------------------------------------------------------------------------------|-----|----|--------|------|----------|----------|
| structural molecule activity (GO:0005198)                                                          | 215 | 25 | 4.06 + | 6.15 | 3.54E-12 | 3.14E-10 |
| acetyltransferase activity (GO:0016407)                                                            | 52  | 6  | 0.98 + | 6.11 | 7.03E-04 | 1.01E-02 |
| endonuclease activity (GO:0004519)                                                                 | 57  | 6  | 1.08 + | 5.57 | 1.09E-03 | 1.38E-02 |
| catalytic activity, acting on RNA (GO:0140098)                                                     | 210 | 22 | 3.97 + | 5.54 | 4.43E-10 | 3.37E-08 |
| ribonuclease activity (GO:0004540)                                                                 | 67  | 7  | 1.27 + | 5.53 | 4.43E-04 | 7.13E-03 |
| transition metal ion binding (GO:0046914)                                                          | 83  | 8  | 1.57 + | 5.1  | 2.90E-04 | 5.71E-03 |
| oxidoreductase activity, acting on the CH-OH group of donors, NAD or NADP as acceptor (GO:0016616) | 64  | 6  | 1.21 + | 4.96 | 1.89E-03 | 2.19E-02 |
| actin filament binding (GO:0051015)                                                                | 86  | 8  | 1.63 + | 4.92 | 3.62E-04 | 6.01E-03 |
| translation regulator activity (GO:0045182)                                                        | 71  | 6  | 1.34 + | 4.47 | 3.07E-03 | 3.26E-02 |

|                                                 |     |    |         |      |          |          |
|-------------------------------------------------|-----|----|---------|------|----------|----------|
| lyase activity (GO:0016829)                     | 86  | 7  | 1.63 +  | 4.31 | 1.73E-03 | 2.04E-02 |
| RNA binding (GO:0003723)                        | 516 | 40 | 9.75 +  | 4.1  | 2.57E-13 | 2.73E-11 |
| actin binding (GO:0003779)                      | 131 | 10 | 2.48 +  | 4.04 | 3.07E-04 | 5.64E-03 |
| oxidoreductase activity (GO:0016491)            | 388 | 27 | 7.33 +  | 3.68 | 1.92E-08 | 1.14E-06 |
| ATPase activity, coupled (GO:0042623)           | 117 | 8  | 2.21 +  | 3.62 | 2.33E-03 | 2.58E-02 |
| nuclease activity (GO:0004518)                  | 120 | 8  | 2.27 +  | 3.53 | 2.70E-03 | 2.93E-02 |
| protein-containing complex binding (GO:0044877) | 274 | 18 | 5.18 +  | 3.48 | 9.72E-06 | 2.72E-04 |
| ATPase activity (GO:0016887)                    | 262 | 16 | 4.95 +  | 3.23 | 6.87E-05 | 1.74E-03 |
| metal ion binding (GO:0046872)                  | 224 | 11 | 4.23 +  | 2.6  | 4.61E-03 | 4.81E-02 |
| cytoskeletal protein binding (GO:0008092)       | 345 | 16 | 6.52 +  | 2.45 | 1.24E-03 | 1.54E-02 |
| pyrophosphatase activity (GO:0016462)           | 565 | 23 | 10.68 + | 2.15 | 8.57E-04 | 1.20E-02 |

|                                                                                                 |      |     |          |      |          |          |
|-------------------------------------------------------------------------------------------------|------|-----|----------|------|----------|----------|
| hydrolase activity, acting on acid anhydrides, in phosphorus-containing anhydrides (GO:0016818) | 567  | 23  | 10.71 +  | 2.15 | 8.82E-04 | 1.20E-02 |
| hydrolase activity, acting on acid anhydrides (GO:0016817)                                      | 567  | 23  | 10.71 +  | 2.15 | 8.82E-04 | 1.17E-02 |
| catalytic activity (GO:0003824)                                                                 | 3598 | 137 | 67.99 +  | 2.02 | 1.37E-16 | 7.30E-14 |
| nucleic acid binding (GO:0003676)                                                               | 1325 | 50  | 25.04 +  | 2    | 6.12E-06 | 2.32E-04 |
| heterocyclic compound binding (GO:1901363)                                                      | 1646 | 59  | 31.1 +   | 1.9  | 3.30E-06 | 1.46E-04 |
| organic cyclic compound binding (GO:0097159)                                                    | 1677 | 59  | 31.69 +  | 1.86 | 6.28E-06 | 2.23E-04 |
| hydrolase activity (GO:0016787)                                                                 | 1584 | 51  | 29.93 +  | 1.7  | 2.55E-04 | 5.22E-03 |
| molecular_function (GO:0003674)                                                                 | 8266 | 230 | 156.19 + | 1.47 | 1.35E-13 | 1.80E-11 |
| binding (GO:0005488)                                                                            | 4589 | 115 | 86.71 +  | 1.33 | 9.26E-04 | 1.20E-02 |

|                                                                                       |       |     |          |        |          |          |
|---------------------------------------------------------------------------------------|-------|-----|----------|--------|----------|----------|
| Unclassified<br>(UNCLASSIFIED)                                                        | 12585 | 164 | 237.81 - | 0.69   | 1.35E-13 | 2.39E-11 |
| signaling receptor binding<br>(GO:0005102)                                            | 629   | 1   | 11.89 -  | 0.08   | 1.37E-04 | 3.04E-03 |
| transcription regulator activity<br>(GO:0140110)                                      | 816   | 1   | 15.42 -  | 0.06   | 7.02E-06 | 2.33E-04 |
| molecular transducer activity<br>(GO:0060089)                                         | 820   | 1   | 15.49 -  | 0.06   | 4.44E-06 | 1.82E-04 |
| transmembrane signaling receptor activity<br>(GO:0004888)                             | 640   | 0   | 12.09 -  | < 0.01 | 8.83E-06 | 2.76E-04 |
| DNA-binding transcription factor activity, RNA polymerase II-specific<br>(GO:0000981) | 373   | 0   | 7.05 -   | < 0.01 | 1.52E-03 | 1.84E-02 |
| DNA-binding transcription factor activity<br>(GO:0003700)                             | 647   | 0   | 12.23 -  | < 0.01 | 9.04E-06 | 2.67E-04 |
| signaling receptor activity<br>(GO:0038023)                                           | 749   | 0   | 14.15 -  | < 0.01 | 1.22E-06 | 5.88E-05 |

Analysis Type: PANTHER Overrepresentation Test (Released 20200728)

Annotation Version and Release Date: PANTHER version 15.0 Released 2020-02-14

Analyzed List: protein.txt (Mycobacterium tuberculosis)  
Reference List: Mycobacterium tuberculosis (all genes in database)

Test Type: FISHER

Correction: FDR

PANTHER GO-Slim Biological Process Mycobacterium tuberculosis protein.txt protein.txt protein.txt protein.txt protein.txt protein.txt (FDR)

|                                                              |    |    |        |      |          |          |
|--------------------------------------------------------------|----|----|--------|------|----------|----------|
| ribonucleoprotein complex subunit organization (GO:0071826)  | 11 | 7  | 1.46 + | 4.81 | 2.86E-03 | 4.36E-02 |
| protein-containing complex subunit organization (GO:0043933) | 14 | 8  | 1.85 + | 4.32 | 2.36E-03 | 4.12E-02 |
| organelle organization (GO:0006996)                          | 14 | 8  | 1.85 + | 4.32 | 2.36E-03 | 4.01E-02 |
| translational elongation (GO:0006414)                        | 48 | 19 | 6.35 + | 2.99 | 1.51E-04 | 5.13E-03 |
| translational (GO:0006412)                                   | 48 | 19 | 6.35 + | 2.99 | 1.51E-04 | 4.86E-03 |

|                                                                     |    |    |         |      |          |          |
|---------------------------------------------------------------------|----|----|---------|------|----------|----------|
| cellular protein metabolic process (GO:0044267)                     | 67 | 26 | 8.86 +  | 2.93 | 2.10E-05 | 9.15E-04 |
| drug metabolic process (GO:0017144)                                 | 48 | 18 | 6.35 +  | 2.83 | 6.41E-04 | 1.51E-02 |
| peptide biosynthetic process (GO:0043043)                           | 52 | 19 | 6.88 +  | 2.76 | 4.83E-04 | 1.18E-02 |
| nucleotide biosynthetic process (GO:0009165)                        | 42 | 15 | 5.56 +  | 2.7  | 2.52E-03 | 4.06E-02 |
| peptide metabolic process (GO:0006518)                              | 57 | 20 | 7.54 +  | 2.65 | 4.39E-04 | 1.17E-02 |
| nucleoside phosphate biosynthetic process (GO:1901293)              | 43 | 15 | 5.69 +  | 2.64 | 2.79E-03 | 4.36E-02 |
| protein metabolic process (GO:0019538)                              | 80 | 27 | 10.58 + | 2.55 | 8.59E-05 | 3.28E-03 |
| nucleobase-containing small molecule metabolic process (GO:0055086) | 67 | 21 | 8.86 +  | 2.37 | 1.12E-03 | 2.36E-02 |

|                                                           |     |    |         |      |          |          |
|-----------------------------------------------------------|-----|----|---------|------|----------|----------|
| organophosphate biosynthetic process (GO:0090407)         | 61  | 19 | 8.07 +  | 2.35 | 2.20E-03 | 3.96E-02 |
| organonitrogen compound biosynthetic process (GO:1901566) | 190 | 58 | 25.13 + | 2.31 | 1.15E-07 | 1.40E-05 |
| carbohydrate derivative biosynthetic process (GO:1901137) | 59  | 18 | 7.8 +   | 2.31 | 3.40E-03 | 4.95E-02 |
| organophosphate metabolic process (GO:0019637)            | 86  | 26 | 11.38 + | 2.29 | 4.71E-04 | 1.20E-02 |
| amide biosynthetic process (GO:0043604)                   | 68  | 20 | 8.99 +  | 2.22 | 3.59E-03 | 4.99E-02 |
| organic acid biosynthetic process (GO:0016053)            | 69  | 20 | 9.13 +  | 2.19 | 3.81E-03 | 5.17E-02 |
| carboxylic acid biosynthetic process (GO:0046394)         | 69  | 20 | 9.13 +  | 2.19 | 3.81E-03 | 5.06E-02 |
| phosphorus metabolic process (GO:0006793)                 | 95  | 27 | 12.57 + | 2.15 | 8.37E-04 | 1.89E-02 |

|                                                              |     |    |         |      |          |          |
|--------------------------------------------------------------|-----|----|---------|------|----------|----------|
| small molecule metabolic process (GO:0044281)                | 244 | 69 | 32.28 + | 2.14 | 7.22E-08 | 1.10E-05 |
| small molecule biosynthetic process (GO:0044283)             | 100 | 28 | 13.23 + | 2.12 | 1.09E-03 | 2.37E-02 |
| cellular amino acid metabolic process (GO:0006520)           | 93  | 26 | 12.3 +  | 2.11 | 1.25E-03 | 2.47E-02 |
| carbohydrate derivative metabolic process (GO:1901135)       | 93  | 26 | 12.3 +  | 2.11 | 1.25E-03 | 2.39E-02 |
| phosphate-containing compound metabolic process (GO:0006796) | 93  | 26 | 12.3 +  | 2.11 | 1.25E-03 | 2.32E-02 |
| cellular amide metabolic process (GO:0043603)                | 83  | 23 | 10.98 + | 2.09 | 3.08E-03 | 4.59E-02 |
| organic acid metabolic process (GO:0006082)                  | 166 | 45 | 21.96 + | 2.05 | 3.85E-05 | 1.57E-03 |
| cellular catabolic process (GO:0044248)                      | 86  | 23 | 11.38 + | 2.02 | 3.81E-03 | 4.95E-02 |



|                                                              |     |     |         |      |          |          |
|--------------------------------------------------------------|-----|-----|---------|------|----------|----------|
| organonitrogen compound metabolic process (GO:1901564)       | 262 | 69  | 34.66 + | 1.99 | 7.10E-07 | 3.62E-05 |
| carboxylic acid metabolic process (GO:0019752)               | 160 | 42  | 21.16 + | 1.98 | 1.77E-04 | 5.41E-03 |
| oxoacid metabolic process (GO:0043436)                       | 163 | 42  | 21.56 + | 1.95 | 2.01E-04 | 5.86E-03 |
| biosynthetic process (GO:0009058)                            | 361 | 88  | 47.75 + | 1.84 | 2.52E-07 | 2.20E-05 |
| cellular biosynthetic process (GO:0044249)                   | 354 | 86  | 46.83 + | 1.84 | 4.40E-07 | 2.69E-05 |
| organic substance biosynthetic process (GO:1901576)          | 355 | 86  | 46.96 + | 1.83 | 4.62E-07 | 2.57E-05 |
| cellular nitrogen compound biosynthetic process (GO:0044271) | 238 | 55  | 31.48 + | 1.75 | 2.25E-04 | 6.24E-03 |
| cellular process (GO:0009987)                                | 616 | 141 | 81.48 + | 1.73 | 6.02E-10 | 3.68E-07 |
| cellular metabolic process (GO:0044237)                      | 558 | 126 | 73.81 + | 1.71 | 2.05E-08 | 4.18E-06 |

|                                                           |      |     |          |      |          |          |
|-----------------------------------------------------------|------|-----|----------|------|----------|----------|
| metabolic process (GO:0008152)                            | 601  | 133 | 79.5 +   | 1.67 | 1.77E-08 | 5.41E-06 |
| organic cyclic compound biosynthetic process (GO:1901362) | 196  | 43  | 25.93 +  | 1.66 | 3.51E-03 | 4.99E-02 |
| organic substance metabolic process (GO:0071704)          | 558  | 122 | 73.81 +  | 1.65 | 1.77E-07 | 1.80E-05 |
| primary metabolic process (GO:0044238)                    | 478  | 104 | 63.23 +  | 1.64 | 2.23E-06 | 1.05E-04 |
| nitrogen compound metabolic process (GO:0006807)          | 436  | 89  | 57.67 +  | 1.54 | 1.22E-04 | 4.39E-03 |
| cellular nitrogen compound metabolic process (GO:0034641) | 340  | 69  | 44.97 +  | 1.53 | 1.17E-03 | 2.39E-02 |
| biological _process (GO:0008150)                          | 745  | 151 | 98.54 +  | 1.53 | 2.70E-07 | 1.83E-05 |
| organic cyclic compound metabolic process (GO:1901360)    | 314  | 63  | 41.53 +  | 1.52 | 2.46E-03 | 4.06E-02 |
| Unclassified (UNCLASSIFIED)                               | 3224 | 374 | 426.46 - | 0.88 | 2.70E-07 | 2.06E-05 |

Analysis Type: PANTHER Overrepresentation Test (Released 20200728)

Annotation Version and Release Date: PANTHER version 15.0 Released 2020-02-14

Analyzed List: protein.txt (Mycobacterium tuberculosis)  
Reference List: Mycobacterium tuberculosis (all genes in database)

Test Type: FISHER

Correction: FDR

PANTHER GO-Slim Cellular Component

|                                        |             |             |             |             |             |                   |
|----------------------------------------|-------------|-------------|-------------|-------------|-------------|-------------------|
| Mycobacterium tuberculosis protein.txt | protein.txt | protein.txt | protein.txt | protein.txt | protein.txt | protein.txt (FDR) |
|----------------------------------------|-------------|-------------|-------------|-------------|-------------|-------------------|

|                                 |     |     |         |      |          |          |
|---------------------------------|-----|-----|---------|------|----------|----------|
| cytoplasm (GO:0005737)          | 286 | 80  | 37.83 + | 2.11 | 7.17E-09 | 2.49E-07 |
| intracellular (GO:0005622)      | 316 | 86  | 41.8 +  | 2.06 | 4.60E-09 | 4.79E-07 |
| intracellular part (GO:0044424) | 314 | 85  | 41.53 + | 2.05 | 6.95E-09 | 3.62E-07 |
| cytoplasmic part (GO:0044444)   | 196 | 49  | 25.93 + | 1.89 | 1.29E-04 | 1.67E-03 |
| cytosol (GO:0005829)            | 161 | 40  | 21.3 +  | 1.88 | 6.50E-04 | 7.51E-03 |
| cell part (GO:0044464)          | 492 | 105 | 65.08 + | 1.61 | 4.13E-06 | 1.07E-04 |
| cell (GO:0005623)               | 492 | 105 | 65.08 + | 1.61 | 4.13E-06 | 8.60E-05 |
| cellular component (GO:0005575) | 511 | 105 | 67.59 + | 1.55 | 1.94E-05 | 2.89E-04 |

Unclassified  
(UNCLASSIFIED)

3458

420

457.41 -

0.92

1.94E-05

3.37E-04

Analysis Type: PANTHER Overrepresentation Test (Released 20200728)

Annotation Version and Release Date: PANTHER version 15.0 Released 2020-02-14

Analyzed List: protein.txt (Mycobacterium tuberculosis)  
Reference List: Mycobacterium tuberculosis (all genes in database)

Test Type: FISHER

Correction: FDR

PANTHER GO-Slim Molecular Function Mycobacterium protein.txt protein.txt protein.txt protein.txt protein.txt protein.txt (FDR)

|                                                 |     |    |         |      |          |          |
|-------------------------------------------------|-----|----|---------|------|----------|----------|
| carbon-oxygen lyase activity (GO:0016835)       | 28  | 12 | 3.7 +   | 3.24 | 1.45E-03 | 2.56E-02 |
| structural molecule activity (GO:0005198)       | 41  | 17 | 5.42 +  | 3.13 | 2.16E-04 | 5.91E-03 |
| structural constituent of ribosome (GO:0003735) | 41  | 17 | 5.42 +  | 3.13 | 2.16E-04 | 5.31E-03 |
| anion binding (GO:0043168)                      | 75  | 26 | 9.92 +  | 2.62 | 6.35E-05 | 2.60E-03 |
| small molecule binding (GO:0036094)             | 84  | 27 | 11.11 + | 2.43 | 1.39E-04 | 4.29E-03 |
| ion binding (GO:0043167)                        | 105 | 33 | 13.89 + | 2.38 | 3.81E-05 | 1.87E-03 |

|                                              |      |     |          |      |          |          |
|----------------------------------------------|------|-----|----------|------|----------|----------|
| oxidoreductase activity (GO:0016491)         | 144  | 39  | 19.05 +  | 2.05 | 1.38E-04 | 4.84E-03 |
| binding (GO:0005488)                         | 276  | 67  | 36.51 +  | 1.84 | 1.03E-05 | 6.37E-04 |
| organic cyclic compound binding (GO:0097159) | 204  | 49  | 26.98 +  | 1.82 | 2.52E-04 | 5.64E-03 |
| heterocyclic compound binding (GO:1901363)   | 204  | 49  | 26.98 +  | 1.82 | 2.52E-04 | 5.17E-03 |
| transferase activity (GO:0016740)            | 210  | 47  | 27.78 +  | 1.69 | 1.29E-03 | 2.45E-02 |
| catalytic activity (GO:0003824)              | 666  | 146 | 88.1 +   | 1.66 | 3.84E-09 | 3.15E-07 |
| molecular_function (GO:0003674)              | 925  | 195 | 122.35 + | 1.59 | 4.12E-11 | 1.01E-08 |
| Unclassified (UNCLASSIFIED)                  | 3044 | 330 | 402.65 - | 0.82 | 4.12E-11 | 5.07E-09 |

Analysis Type: PANTHER Overrepresentation Test (Released 20200728)

Annotation Version and Release Date: PANTHER version 15.0 Released 2020-02-14

Analyzed List: protein.txt (Mus musculus)

Reference List: Mus musculus (all genes in database)

Test Type: FISHER

Correction: FDR

PANTHER GO-Slim Biological Process: Mus musc protein.txt protein.txt protein.txt protein.txt protein.txt protein.txt (FDR)

|                                                                  |    |   |        |       |          |          |
|------------------------------------------------------------------|----|---|--------|-------|----------|----------|
| folic acid-containing compound biosynthetic process (GO:0009396) | 5  | 3 | 0.11 + | 26.35 | 5.65E-04 | 1.12E-02 |
| heme biosynthetic process (GO:0006783)                           | 7  | 3 | 0.16 + | 18.82 | 1.17E-03 | 2.00E-02 |
| heme metabolic process (GO:0042168)                              | 10 | 4 | 0.23 + | 17.57 | 2.04E-04 | 5.25E-03 |
| porphyrin-containing compound metabolic process (GO:0006778)     | 10 | 4 | 0.23 + | 17.57 | 2.04E-04 | 5.19E-03 |

|                                                                                              |    |   |        |       |          |          |
|----------------------------------------------------------------------------------------------|----|---|--------|-------|----------|----------|
| pteridine<br>-<br>containin<br>g<br>compoun<br>d<br>metabolic<br>process<br>(GO:0042<br>558) | 13 | 5 | 0.3 +  | 16.89 | 3.62E-05 | 1.29E-03 |
| tetrapyrro<br>le<br>metabolic<br>process<br>(GO:0033<br>013)                                 | 11 | 4 | 0.25 + | 15.97 | 2.73E-04 | 6.47E-03 |
| cholester<br>ol<br>metabolic<br>process<br>(GO:0008<br>203)                                  | 12 | 4 | 0.27 + | 14.64 | 3.57E-04 | 7.93E-03 |
| folic acid-<br>containin<br>g<br>compoun<br>d<br>metabolic<br>process<br>(GO:0006<br>760)    | 10 | 3 | 0.23 + | 13.17 | 2.66E-03 | 3.70E-02 |
| regulatio<br>n of<br>ATPase<br>activity<br>(GO:0043<br>462)                                  | 11 | 3 | 0.25 + | 11.98 | 3.33E-03 | 4.46E-02 |
| mitochon<br>drial<br>translatio<br>n<br>(GO:0032<br>543)                                     | 15 | 4 | 0.34 + | 11.71 | 7.21E-04 | 1.40E-02 |
| pigment<br>metabolic<br>process<br>(GO:0042<br>440)                                          | 16 | 4 | 0.36 + | 10.98 | 8.86E-04 | 1.63E-02 |
| inner<br>mitochon<br>drial<br>membran<br>e<br>organizati<br>on<br>(GO:0007<br>007)           | 18 | 4 | 0.41 + | 9.76  | 1.29E-03 | 2.18E-02 |



|                                                                     |     |    |        |      |          |          |
|---------------------------------------------------------------------|-----|----|--------|------|----------|----------|
| coenzyme biosynthetic process (GO:0009108)                          | 41  | 9  | 0.93 + | 9.64 | 1.39E-06 | 7.02E-05 |
| coenzyme metabolic process (GO:0006732)                             | 88  | 18 | 2 +    | 8.98 | 2.12E-11 | 3.13E-09 |
| cellular amino acid metabolic process (GO:0006520)                  | 123 | 25 | 2.8 +  | 8.93 | 2.93E-15 | 1.01E-12 |
| response to oxidative stress (GO:0006979)                           | 25  | 5  | 0.57 + | 8.78 | 4.82E-04 | 9.86E-03 |
| cofactor biosynthetic process (GO:0051188)                          | 65  | 13 | 1.48 + | 8.78 | 1.67E-08 | 1.28E-06 |
| alpha-amino acid metabolic process (GO:1901605)                     | 77  | 15 | 1.75 + | 8.55 | 1.81E-09 | 1.70E-07 |
| cellular modified amino acid metabolic process (GO:0006575)         | 67  | 13 | 1.53 + | 8.52 | 2.29E-08 | 1.58E-06 |
| mitochondrial ATP synthesis coupled electron transport (GO:0042775) | 21  | 4  | 0.48 + | 8.36 | 2.12E-03 | 3.15E-02 |

|                                                       |    |    |        |      |          |          |
|-------------------------------------------------------|----|----|--------|------|----------|----------|
| ATP synthesis coupled electron transport (GO:0042773) | 22 | 4  | 0.5 +  | 7.98 | 2.46E-03 | 3.45E-02 |
| carboxylic acid biosynthetic process (GO:0046394)     | 84 | 15 | 1.91 + | 7.84 | 5.16E-09 | 4.44E-07 |
| organic acid biosynthetic process (GO:0016053)        | 84 | 15 | 1.91 + | 7.84 | 5.16E-09 | 4.26E-07 |
| cellular amino acid biosynthetic process (GO:0008652) | 34 | 6  | 0.77 + | 7.75 | 2.39E-04 | 5.93E-03 |
| fatty acid biosynthetic process (GO:0006633)          | 34 | 6  | 0.77 + | 7.75 | 2.39E-04 | 5.86E-03 |
| nucleobase metabolic process (GO:0009112)             | 23 | 4  | 0.52 + | 7.64 | 2.84E-03 | 3.90E-02 |
| mitochondrial membrane organization (GO:0007006)      | 23 | 4  | 0.52 + | 7.64 | 2.84E-03 | 3.88E-02 |
| secondary alcohol metabolic process (GO:1902652)      | 23 | 4  | 0.52 + | 7.64 | 2.84E-03 | 3.85E-02 |

|                                                                               |     |    |        |      |          |          |
|-------------------------------------------------------------------------------|-----|----|--------|------|----------|----------|
| cofactor<br>metabolic<br>process<br>(GO:0051<br>186)                          | 168 | 29 | 3.83 + | 7.58 | 7.68E-16 | 3.17E-13 |
| glutathio<br>ne<br>metabolic<br>process<br>(GO:0006<br>749)                   | 35  | 6  | 0.8 +  | 7.53 | 2.74E-04 | 6.43E-03 |
| acyl-CoA<br>metabolic<br>process<br>(GO:0006<br>637)                          | 35  | 6  | 0.8 +  | 7.53 | 2.74E-04 | 6.36E-03 |
| respirator<br>y electron<br>transport<br>chain<br>(GO:0022<br>904)            | 30  | 5  | 0.68 + | 7.32 | 1.00E-03 | 1.82E-02 |
| electron<br>transport<br>chain<br>(GO:0022<br>900)                            | 30  | 5  | 0.68 + | 7.32 | 1.00E-03 | 1.80E-02 |
| small<br>molecule<br>biosynthe<br>tic<br>process<br>(GO:0044<br>283)          | 155 | 25 | 3.53 + | 7.08 | 3.02E-13 | 6.93E-11 |
| mitochon<br>drial gene<br>expressio<br>n<br>(GO:0140<br>053)                  | 25  | 4  | 0.57 + | 7.03 | 3.71E-03 | 4.81E-02 |
| monocar<br>boxylic<br>acid<br>biosynthe<br>tic<br>process<br>(GO:0072<br>330) | 38  | 6  | 0.87 + | 6.93 | 4.07E-04 | 8.94E-03 |
| sulfur<br>compoun<br>d<br>metabolic<br>process<br>(GO:0006<br>790)            | 118 | 18 | 2.69 + | 6.7  | 1.45E-09 | 1.42E-07 |

|                                                 |     |    |         |      |          |          |
|-------------------------------------------------|-----|----|---------|------|----------|----------|
| carboxylic acid catabolic process (GO:0046395)  | 73  | 11 | 1.66 +  | 6.62 | 2.57E-06 | 1.20E-04 |
| organic acid catabolic process (GO:0016054)     | 73  | 11 | 1.66 +  | 6.62 | 2.57E-06 | 1.18E-04 |
| small molecule catabolic process (GO:0044282)   | 108 | 15 | 2.46 +  | 6.1  | 1.03E-07 | 6.65E-06 |
| hexose metabolic process (GO:0019318)           | 36  | 5  | 0.82 +  | 6.1  | 2.08E-03 | 3.10E-02 |
| carboxylic acid metabolic process (GO:0019752)  | 331 | 44 | 7.54 +  | 5.84 | 1.83E-19 | 1.89E-16 |
| oxoacid metabolic process (GO:0043436)          | 342 | 44 | 7.79 +  | 5.65 | 5.65E-19 | 3.89E-16 |
| organic acid metabolic process (GO:0006082)     | 355 | 44 | 8.08 +  | 5.44 | 2.03E-18 | 1.05E-15 |
| small molecule metabolic process (GO:0044281)   | 587 | 71 | 13.37 + | 5.31 | 1.05E-28 | 2.18E-25 |
| ribosomal large subunit biogenesis (GO:0042273) | 63  | 7  | 1.43 +  | 4.88 | 9.30E-04 | 1.70E-02 |

|                                                                     |     |    |        |      |          |          |
|---------------------------------------------------------------------|-----|----|--------|------|----------|----------|
| cellular amide metabolic process (GO:0043603)                       | 369 | 39 | 8.4 +  | 4.64 | 2.21E-14 | 6.51E-12 |
| purine-containing compound metabolic process (GO:0072521)           | 152 | 16 | 3.46 + | 4.62 | 1.19E-06 | 6.28E-05 |
| peptide biosynthetic process (GO:0043043)                           | 219 | 23 | 4.99 + | 4.61 | 5.84E-09 | 4.64E-07 |
| monocarboxylic acid metabolic process (GO:0032787)                  | 181 | 19 | 4.12 + | 4.61 | 1.24E-07 | 7.55E-06 |
| fatty acid metabolic process (GO:0006631)                           | 125 | 13 | 2.85 + | 4.57 | 1.33E-05 | 5.38E-04 |
| nucleobase-containing small molecule metabolic process (GO:0055086) | 202 | 21 | 4.6 +  | 4.57 | 3.16E-08 | 2.10E-06 |
| cellular respiration (GO:0045333)                                   | 58  | 6  | 1.32 + | 4.54 | 2.98E-03 | 4.02E-02 |
| amide biosynthetic process (GO:0043604)                             | 252 | 26 | 5.74 + | 4.53 | 8.36E-10 | 9.58E-08 |

|                                                         |     |    |        |      |          |          |
|---------------------------------------------------------|-----|----|--------|------|----------|----------|
| translational elongation (GO:0006414)                   | 216 | 22 | 4.92 + | 4.47 | 2.08E-08 | 1.53E-06 |
| translational (GO:0006412)                              | 216 | 22 | 4.92 + | 4.47 | 2.08E-08 | 1.48E-06 |
| peptide metabolic process (GO:0006518)                  | 286 | 29 | 6.51 + | 4.45 | 1.27E-10 | 1.55E-08 |
| alcohol metabolic process (GO:0006066)                  | 70  | 7  | 1.59 + | 4.39 | 1.63E-03 | 2.59E-02 |
| nucleotide metabolic process (GO:0009117)               | 163 | 16 | 3.71 + | 4.31 | 2.74E-06 | 1.23E-04 |
| organic hydroxy compound metabolic process (GO:1901615) | 94  | 9  | 2.14 + | 4.2  | 4.93E-04 | 9.98E-03 |
| nucleoside phosphate metabolic process (GO:0006753)     | 168 | 16 | 3.83 + | 4.18 | 3.92E-06 | 1.72E-04 |
| purine ribonucleotide metabolic process (GO:0009150)    | 130 | 12 | 2.96 + | 4.05 | 8.27E-05 | 2.71E-03 |
| tRNA metabolic process (GO:0006399)                     | 99  | 9  | 2.25 + | 3.99 | 6.97E-04 | 1.37E-02 |

|                                                           |     |    |         |      |          |          |
|-----------------------------------------------------------|-----|----|---------|------|----------|----------|
| ribonucleotide metabolic process (GO:0009259)             | 135 | 12 | 3.07 +  | 3.9  | 1.15E-04 | 3.40E-03 |
| purine nucleotide metabolic process (GO:0006163)          | 138 | 12 | 3.14 +  | 3.82 | 1.40E-04 | 4.00E-03 |
| organic cyclic compound catabolic process (GO:1901361)    | 151 | 13 | 3.44 +  | 3.78 | 8.18E-05 | 2.72E-03 |
| drug metabolic process (GO:0017144)                       | 189 | 16 | 4.3 +   | 3.72 | 1.55E-05 | 6.14E-04 |
| ribose phosphate metabolic process (GO:0019693)           | 143 | 12 | 3.26 +  | 3.69 | 1.90E-04 | 5.03E-03 |
| organonitrogen compound biosynthetic process (GO:1901566) | 589 | 49 | 13.41 + | 3.65 | 4.90E-14 | 1.26E-11 |
| aromatic compound catabolic process (GO:0019439)          | 139 | 10 | 3.17 +  | 3.16 | 1.90E-03 | 2.91E-02 |
| heterocycle catabolic process (GO:0046700)                | 140 | 10 | 3.19 +  | 3.14 | 2.00E-03 | 3.03E-02 |

|                                                                                |      |     |         |      |          |          |
|--------------------------------------------------------------------------------|------|-----|---------|------|----------|----------|
| oxidation<br>-<br>reduction<br>process<br>(GO:0055<br>114)                     | 220  | 15  | 5.01 +  | 2.99 | 2.71E-04 | 6.49E-03 |
| ribosome<br>biogenesi<br>s<br>(GO:0042<br>254)                                 | 176  | 12  | 4.01 +  | 2.99 | 1.08E-03 | 1.86E-02 |
| ncRNA<br>metabolic<br>process<br>(GO:0034<br>660)                              | 240  | 14  | 5.47 +  | 2.56 | 1.77E-03 | 2.77E-02 |
| organoph<br>osphate<br>metabolic<br>process<br>(GO:0019<br>637)                | 312  | 17  | 7.1 +   | 2.39 | 1.79E-03 | 2.76E-02 |
| organic<br>substance<br>catabolic<br>process<br>(GO:1901<br>575)               | 703  | 36  | 16.01 + | 2.25 | 1.16E-05 | 4.88E-04 |
| lipid<br>metabolic<br>process<br>(GO:0006<br>629)                              | 401  | 20  | 9.13 +  | 2.19 | 2.07E-03 | 3.12E-02 |
| catabolic<br>process<br>(GO:0009<br>056)                                       | 888  | 42  | 20.22 + | 2.08 | 1.86E-05 | 7.11E-04 |
| cellular<br>catabolic<br>process<br>(GO:0044<br>248)                           | 765  | 33  | 17.42 + | 1.89 | 8.17E-04 | 1.52E-02 |
| organonit<br>rogen<br>compoun<br>d<br>metabolic<br>process<br>(GO:1901<br>564) | 2527 | 106 | 57.54 + | 1.84 | 9.87E-10 | 1.07E-07 |
| biosynthe<br>tic<br>process<br>(GO:0009<br>058)                                | 2006 | 76  | 45.68 + | 1.66 | 1.61E-05 | 6.26E-04 |



|                                                           |      |     |          |      |          |          |
|-----------------------------------------------------------|------|-----|----------|------|----------|----------|
| cellular biosynthetic process (GO:0044249)                | 1964 | 73  | 44.72 +  | 1.63 | 5.25E-05 | 1.84E-03 |
| organic substance biosynthetic process (GO:1901576)       | 1986 | 73  | 45.22 +  | 1.61 | 7.99E-05 | 2.70E-03 |
| cellular nitrogen compound metabolic process (GO:0034641) | 2415 | 83  | 54.99 +  | 1.51 | 2.29E-04 | 5.76E-03 |
| cellular metabolic process (GO:0044237)                   | 4357 | 144 | 99.21 +  | 1.45 | 2.54E-06 | 1.22E-04 |
| metabolic process (GO:0008152)                            | 4857 | 158 | 110.6 +  | 1.43 | 1.29E-06 | 6.67E-05 |
| organic substance metabolic process (GO:0071704)          | 4680 | 149 | 106.57 + | 1.4  | 1.31E-05 | 5.40E-04 |
| nitrogen compound metabolic process (GO:0006807)          | 4212 | 127 | 95.91 +  | 1.32 | 7.27E-04 | 1.40E-02 |
| primary metabolic process (GO:0044238)                    | 4458 | 131 | 101.51 + | 1.29 | 1.69E-03 | 2.66E-02 |
| regulation of metabolic process (GO:0019222)              | 1956 | 24  | 44.54 -  | 0.54 | 7.71E-04 | 1.45E-02 |

|                                                                |      |    |          |      |          |          |
|----------------------------------------------------------------|------|----|----------|------|----------|----------|
| biological regulation (GO:0065007)                             | 4862 | 57 | 110.71 - | 0.51 | 1.04E-09 | 1.07E-07 |
| regulation of cellular metabolic process (GO:0031323)          | 1821 | 21 | 41.47 -  | 0.51 | 5.03E-04 | 1.01E-02 |
| regulation of primary metabolic process (GO:0080090)           | 1804 | 20 | 41.08 -  | 0.49 | 2.57E-04 | 6.25E-03 |
| regulation of gene expression (GO:0010468)                     | 1368 | 15 | 31.15 -  | 0.48 | 1.79E-03 | 2.78E-02 |
| regulation of nitrogen compound metabolic process (GO:0051171) | 1782 | 19 | 40.58 -  | 0.47 | 1.66E-04 | 4.45E-03 |
| regulation of macromolecule metabolic process (GO:0060255)     | 1878 | 20 | 42.76 -  | 0.47 | 1.20E-04 | 3.48E-03 |
| regulation of cellular biosynthetic process (GO:0031326)       | 1234 | 12 | 28.1 -   | 0.43 | 1.01E-03 | 1.80E-02 |
| response to stimulus (GO:0050896)                              | 3351 | 32 | 76.31 -  | 0.42 | 2.11E-09 | 1.89E-07 |

|                                                                        |      |    |          |      |          |          |
|------------------------------------------------------------------------|------|----|----------|------|----------|----------|
| multicellular organismal process (GO:0032501)                          | 1378 | 13 | 31.38 -  | 0.41 | 3.23E-04 | 7.25E-03 |
| RNA biosynthetic process (GO:0032774)                                  | 1166 | 11 | 26.55 -  | 0.41 | 1.06E-03 | 1.83E-02 |
| regulation of biological process (GO:0050789)                          | 4413 | 41 | 100.49 - | 0.41 | 5.54E-13 | 1.14E-10 |
| regulation of cellular process (GO:0050794)                            | 4160 | 38 | 94.73 -  | 0.4  | 2.03E-12 | 3.81E-10 |
| regulation of cellular macromolecule biosynthetic process (GO:2000112) | 1216 | 11 | 27.69 -  | 0.4  | 4.50E-04 | 9.58E-03 |
| regulation of macromolecule biosynthetic process (GO:0010556)          | 1223 | 11 | 27.85 -  | 0.39 | 4.57E-04 | 9.63E-03 |
| multicellular organism development (GO:0007275)                        | 828  | 7  | 18.85 -  | 0.37 | 3.73E-03 | 4.82E-02 |
| anatomical structure development (GO:0048856)                          | 1076 | 9  | 24.5 -   | 0.37 | 4.65E-04 | 9.69E-03 |

|                                                                             |      |    |         |      |          |          |
|-----------------------------------------------------------------------------|------|----|---------|------|----------|----------|
| developmental process (GO:0032502)                                          | 1209 | 10 | 27.53 - | 0.36 | 1.93E-04 | 5.05E-03 |
| regulation of RNA metabolic process (GO:0051252)                            | 1222 | 10 | 27.83 - | 0.36 | 1.43E-04 | 3.93E-03 |
| regulation of nucleobase-containing compound metabolic process (GO:0019219) | 1263 | 10 | 28.76 - | 0.35 | 7.88E-05 | 2.71E-03 |
| nucleic acid-templated transcription (GO:0097659)                           | 1159 | 9  | 26.39 - | 0.34 | 1.42E-04 | 4.02E-03 |
| transcription, DNA-templated (GO:0006351)                                   | 1159 | 9  | 26.39 - | 0.34 | 1.42E-04 | 3.96E-03 |
| cellular response to stimulus (GO:0051716)                                  | 2758 | 20 | 62.8 -  | 0.32 | 1.00E-10 | 1.29E-08 |
| regulation of transcription, DNA-templated (GO:0006355)                     | 1117 | 8  | 25.44 - | 0.31 | 1.03E-04 | 3.19E-03 |

|                                                                 |      |    |       |   |      |          |          |
|-----------------------------------------------------------------|------|----|-------|---|------|----------|----------|
| regulation of nucleic acid-templated transcription (GO:1903506) | 1117 | 8  | 25.44 | - | 0.31 | 1.03E-04 | 3.14E-03 |
| regulation of RNA biosynthetic process (GO:2001141)             | 1117 | 8  | 25.44 | - | 0.31 | 1.03E-04 | 3.09E-03 |
| regulation of transcription by RNA polymerase II (GO:0006357)   | 745  | 5  | 16.96 | - | 0.29 | 1.44E-03 | 2.41E-02 |
| positive regulation of cellular process (GO:0048522)            | 1346 | 9  | 30.65 | - | 0.29 | 6.29E-06 | 2.70E-04 |
| transcription by RNA polymerase II (GO:0006366)                 | 772  | 5  | 17.58 | - | 0.28 | 7.47E-04 | 1.43E-02 |
| positive regulation of biological process (GO:0048518)          | 1559 | 9  | 35.5  | - | 0.25 | 1.72E-07 | 9.88E-06 |
| signal transduction (GO:0007165)                                | 2229 | 12 | 50.76 | - | 0.24 | 4.13E-11 | 5.68E-09 |
| signaling (GO:0023052)                                          | 2365 | 12 | 53.85 | - | 0.22 | 3.31E-12 | 5.69E-10 |

|                                                                                      |      |    |         |      |          |          |
|--------------------------------------------------------------------------------------|------|----|---------|------|----------|----------|
| cell communication (GO:0007154)                                                      | 2367 | 12 | 53.9 -  | 0.22 | 3.35E-12 | 5.32E-10 |
| G protein-coupled receptor signaling pathway (GO:0007186)                            | 682  | 3  | 15.53 - | 0.19 | 2.99E-04 | 6.86E-03 |
| positive regulation of nucleobase-containing compound metabolic process (GO:0045935) | 461  | 2  | 10.5 -  | 0.19 | 3.63E-03 | 4.74E-02 |
| multi-organism process (GO:0051704)                                                  | 570  | 2  | 12.98 - | 0.15 | 4.49E-04 | 9.65E-03 |
| regulation of signal transduction (GO:0009966)                                       | 627  | 2  | 14.28 - | 0.14 | 1.57E-04 | 4.27E-03 |
| response to external stimulus (GO:0009605)                                           | 686  | 2  | 15.62 - | 0.13 | 3.58E-05 | 1.34E-03 |
| regulation of response to stimulus (GO:0048583)                                      | 1032 | 3  | 23.5 -  | 0.13 | 2.26E-07 | 1.26E-05 |
| regulation of cell communication (GO:0010646)                                        | 691  | 2  | 15.73 - | 0.13 | 3.59E-05 | 1.32E-03 |

|                                                        |     |   |         |        |          |          |
|--------------------------------------------------------|-----|---|---------|--------|----------|----------|
| regulation of signaling (GO:0023051)                   | 693 | 2 | 15.78 - | 0.13   | 3.62E-05 | 1.31E-03 |
| regulation of immune system process (GO:0002682)       | 389 | 1 | 8.86 -  | 0.11   | 2.72E-03 | 3.77E-02 |
| cell surface receptor signaling pathway (GO:0007166)   | 925 | 2 | 21.06 - | 0.09   | 2.94E-07 | 1.60E-05 |
| defense response (GO:0006952)                          | 477 | 1 | 10.86 - | 0.09   | 4.32E-04 | 9.38E-03 |
| immune system process (GO:0002376)                     | 839 | 1 | 19.11 - | 0.05   | 1.46E-07 | 8.64E-06 |
| membrane invagination (GO:0010324)                     | 303 | 0 | 6.9 -   | < 0.01 | 2.38E-03 | 3.47E-02 |
| positive regulation of cell communication (GO:0010647) | 292 | 0 | 6.65 -  | < 0.01 | 2.25E-03 | 3.32E-02 |
| response to external biotic stimulus (GO:0043207)      | 429 | 0 | 9.77 -  | < 0.01 | 9.68E-05 | 3.12E-03 |
| positive regulation of signaling (GO:0023056)          | 293 | 0 | 6.67 -  | < 0.01 | 2.26E-03 | 3.30E-02 |

|                                                                                      |     |   |        |        |          |          |
|--------------------------------------------------------------------------------------|-----|---|--------|--------|----------|----------|
| defense response to bacterium (GO:0042742)                                           | 273 | 0 | 6.22 - | < 0.01 | 3.33E-03 | 4.44E-02 |
| response to other organism (GO:0051707)                                              | 429 | 0 | 9.77 - | < 0.01 | 9.68E-05 | 3.07E-03 |
| regulation of intracellular signal transduction (GO:1902531)                         | 368 | 0 | 8.38 - | < 0.01 | 4.81E-04 | 9.93E-03 |
| innate immune response (GO:0045087)                                                  | 319 | 0 | 7.26 - | < 0.01 | 1.59E-03 | 2.59E-02 |
| positive regulation of immune system process (GO:0002684)                            | 358 | 0 | 8.15 - | < 0.01 | 7.63E-04 | 1.44E-02 |
| negative regulation of nucleobase-containing compound metabolic process (GO:0045934) | 329 | 0 | 7.49 - | < 0.01 | 1.03E-03 | 1.82E-02 |
| response to bacterium (GO:0009617)                                                   | 317 | 0 | 7.22 - | < 0.01 | 1.57E-03 | 2.57E-02 |
| nervous system process (GO:0050877)                                                  | 320 | 0 | 7.29 - | < 0.01 | 1.61E-03 | 2.59E-02 |



|                                                                          |     |   |         |        |          |          |
|--------------------------------------------------------------------------|-----|---|---------|--------|----------|----------|
| response to biotic stimulus (GO:0009607)                                 | 430 | 0 | 9.79 -  | < 0.01 | 9.70E-05 | 3.03E-03 |
| negative regulation of nucleic acid-templated transcription (GO:1903507) | 305 | 0 | 6.95 -  | < 0.01 | 2.43E-03 | 3.49E-02 |
| positive regulation of response to stimulus (GO:0048584)                 | 612 | 0 | 13.94 - | < 0.01 | 1.99E-06 | 9.80E-05 |
| activation of immune response (GO:0002253)                               | 278 | 0 | 6.33 -  | < 0.01 | 3.36E-03 | 4.45E-02 |
| immune effector process (GO:0002252)                                     | 309 | 0 | 7.04 -  | < 0.01 | 1.52E-03 | 2.53E-02 |
| humoral immune response (GO:0006959)                                     | 279 | 0 | 6.35 -  | < 0.01 | 3.37E-03 | 4.44E-02 |
| immune response (GO:0006955)                                             | 729 | 0 | 16.6 -  | < 0.01 | 1.19E-07 | 7.46E-06 |
| negative regulation of RNA metabolic process (GO:0051253)                | 316 | 0 | 7.2 -   | < 0.01 | 1.56E-03 | 2.57E-02 |

|                                                                  |     |   |        |        |          |          |
|------------------------------------------------------------------|-----|---|--------|--------|----------|----------|
| negative regulation of transcription, DNA-templated (GO:0045892) | 305 | 0 | 6.95 - | < 0.01 | 2.43E-03 | 3.46E-02 |
| positive regulation of immune response (GO:0050778)              | 321 | 0 | 7.31 - | < 0.01 | 1.62E-03 | 2.60E-02 |
| regulation of immune response (GO:0050776)                       | 331 | 0 | 7.54 - | < 0.01 | 1.04E-03 | 1.82E-02 |
| negative regulation of RNA biosynthetic process (GO:1902679)     | 305 | 0 | 6.95 - | < 0.01 | 2.43E-03 | 3.44E-02 |
| endocytosis (GO:0006897)                                         | 303 | 0 | 6.9 -  | < 0.01 | 2.38E-03 | 3.44E-02 |
| defense response to other organism (GO:0098542)                  | 381 | 0 | 8.68 - | < 0.01 | 3.18E-04 | 7.21E-03 |

Analysis Type: PANTHER Overrepresentation Test (Released 20200728)

Annotation Version and Release Date: PANTHER version 15.0 Released 2020-02-14

Analyzed List: protein.txt (Mus musculus)

Reference List: Mus musculus (all genes in database)

Test Type: FISHER

Correction: FDR

PANTHER GO-Slim Cellular Component Mus musc protein.txt protein.txt protein.txt protein.txt protein.txt protein.txt (FDR)

|                                                        |    |    |        |       |          |          |
|--------------------------------------------------------|----|----|--------|-------|----------|----------|
| mitochondrial respiratory chain complex I (GO:0005747) | 24 | 11 | 0.55 + | 20.13 | 1.54E-10 | 3.48E-09 |
| respiratory chain complex I (GO:0045271)               | 27 | 12 | 0.61 + | 19.52 | 2.95E-11 | 9.03E-10 |
| NADH dehydrogenase complex (GO:0030964)                | 28 | 12 | 0.64 + | 18.82 | 4.13E-11 | 1.19E-09 |
| oligosaccharyltransferase complex (GO:0008250)         | 8  | 3  | 0.18 + | 16.47 | 1.58E-03 | 1.55E-02 |
| respiratory chain complex (GO:0098803)                 | 44 | 14 | 1 +    | 13.97 | 2.55E-11 | 8.28E-10 |

|                                                                       |     |    |        |       |          |          |
|-----------------------------------------------------------------------|-----|----|--------|-------|----------|----------|
| mitochondrial<br>respirasome<br>(GO:0005746)                          | 41  | 13 | 0.93 + | 13.92 | 1.37E-10 | 3.23E-09 |
| oxidoreductase<br>complex<br>(GO:1990204)                             | 43  | 13 | 0.98 + | 13.28 | 2.24E-10 | 4.85E-09 |
| respirasome<br>(GO:0070469)                                           | 48  | 14 | 1.09 + | 12.81 | 6.73E-11 | 1.75E-09 |
| inner<br>mitochondrial<br>membrane protein<br>complex<br>(GO:0098800) | 69  | 17 | 1.57 + | 10.82 | 6.01E-12 | 3.13E-10 |
| ER to<br>Golgi<br>transport<br>vesicle<br>membrane<br>(GO:0012507)    | 14  | 3  | 0.32 + | 9.41  | 5.91E-03 | 4.46E-02 |
| mitochondrial inner<br>membrane<br>(GO:0005743)                       | 118 | 24 | 2.69 + | 8.93  | 1.05E-14 | 1.09E-12 |
| mitochondrial<br>protein<br>complex<br>(GO:0098798)                   | 115 | 23 | 2.62 + | 8.78  | 5.15E-14 | 3.83E-12 |
| large<br>ribosomal<br>subunit<br>(GO:0015934)                         | 86  | 16 | 1.96 + | 8.17  | 9.40E-10 | 1.88E-08 |
| organelle<br>inner<br>membrane<br>(GO:0019866)                        | 132 | 24 | 3.01 + | 7.98  | 9.09E-14 | 5.25E-12 |

|                                                |     |    |         |      |          |          |
|------------------------------------------------|-----|----|---------|------|----------|----------|
| mitochondrial membrane part (GO:0044455)       | 106 | 19 | 2.41 +  | 7.87 | 4.39E-11 | 1.20E-09 |
| cytosolic large ribosomal subunit (GO:0022625) | 64  | 11 | 1.46 +  | 7.55 | 8.10E-07 | 1.36E-05 |
| mitochondrial membrane (GO:0031966)            | 174 | 27 | 3.96 +  | 6.81 | 7.69E-14 | 5.00E-12 |
| cytosolic ribosome (GO:0022626)                | 104 | 16 | 2.37 +  | 6.76 | 1.06E-08 | 1.98E-07 |
| mitochondrial envelope (GO:0005740)            | 189 | 29 | 4.3 +   | 6.74 | 1.17E-14 | 1.01E-12 |
| ribosome (GO:0005840)                          | 151 | 23 | 3.44 +  | 6.69 | 7.73E-12 | 3.65E-10 |
| mitochondrial part (GO:0044429)                | 239 | 36 | 5.44 +  | 6.61 | 1.14E-17 | 1.48E-15 |
| ribosomal subunit (GO:0044391)                 | 143 | 21 | 3.26 +  | 6.45 | 1.16E-10 | 2.88E-09 |
| mitochondrial matrix (GO:0005759)              | 56  | 8  | 1.28 +  | 6.27 | 8.47E-05 | 1.10E-03 |
| mitochondrion (GO:0005739)                     | 442 | 61 | 10.06 + | 6.06 | 1.87E-27 | 9.70E-25 |
| organellar ribosome (GO:0000313)               | 30  | 4  | 0.68 +  | 5.86 | 6.64E-03 | 4.86E-02 |
| mitochondrial ribosome (GO:0005761)            | 30  | 4  | 0.68 +  | 5.86 | 6.64E-03 | 4.79E-02 |

|                                                                                                               |     |    |         |      |          |          |
|---------------------------------------------------------------------------------------------------------------|-----|----|---------|------|----------|----------|
| focal<br>adhesion<br>(GO:0005<br>925)                                                                         | 38  | 5  | 0.87 +  | 5.78 | 2.57E-03 | 2.23E-02 |
| cytosolic<br>small<br>ribosomal<br>subunit<br>(GO:0022<br>627)                                                | 40  | 5  | 0.91 +  | 5.49 | 3.15E-03 | 2.52E-02 |
| cytosolic<br>part<br>(GO:0044<br>445)                                                                         | 162 | 19 | 3.69 +  | 5.15 | 2.51E-08 | 4.49E-07 |
| envelope<br>(GO:0031<br>975)                                                                                  | 283 | 30 | 6.44 +  | 4.66 | 2.23E-11 | 8.29E-10 |
| organelle<br>envelope<br>(GO:0031<br>967)                                                                     | 283 | 30 | 6.44 +  | 4.66 | 2.23E-11 | 7.74E-10 |
| organelle<br>membran<br>e<br>(GO:0031<br>090)                                                                 | 665 | 45 | 15.14 + | 2.97 | 3.43E-10 | 7.13E-09 |
| cytosol<br>(GO:0005<br>829)                                                                                   | 753 | 46 | 17.15 + | 2.68 | 4.59E-09 | 8.84E-08 |
| ribonucle<br>oprotein<br>complex<br>(GO:1990<br>904)                                                          | 463 | 28 | 10.54 + | 2.66 | 6.23E-06 | 9.53E-05 |
| endoplas<br>mic<br>reticulum<br>membran<br>e<br>(GO:0005<br>789)                                              | 217 | 13 | 4.94 +  | 2.63 | 2.04E-03 | 1.87E-02 |
| nuclear<br>outer<br>membran<br>e-<br>endoplas<br>mic<br>reticulum<br>membran<br>e network<br>(GO:0042<br>175) | 219 | 13 | 4.99 +  | 2.61 | 2.21E-03 | 1.98E-02 |

|                                           |      |     |          |      |          |          |
|-------------------------------------------|------|-----|----------|------|----------|----------|
| endoplasmic reticulum part (GO:0044432)   | 251  | 14  | 5.72 +   | 2.45 | 2.61E-03 | 2.23E-02 |
| membrane protein complex (GO:0098796)     | 541  | 30  | 12.32 +  | 2.44 | 1.66E-05 | 2.34E-04 |
| cytoplasmic part (GO:0044444)             | 2902 | 148 | 66.08 +  | 2.24 | 4.15E-21 | 7.19E-19 |
| endoplasmic reticulum (GO:0005783)        | 450  | 21  | 10.25 +  | 2.05 | 2.45E-03 | 2.16E-02 |
| catalytic complex (GO:1902494)            | 772  | 35  | 17.58 +  | 1.99 | 2.09E-04 | 2.53E-03 |
| cytoplasm (GO:0005737)                    | 4183 | 189 | 95.25 +  | 1.98 | 6.93E-22 | 1.80E-19 |
| intracellular organelle part (GO:0044446) | 2644 | 98  | 60.21 +  | 1.63 | 1.68E-06 | 2.72E-05 |
| organelle part (GO:0044422)               | 2726 | 99  | 62.07 +  | 1.59 | 4.27E-06 | 6.73E-05 |
| intracellular part (GO:0044424)           | 6691 | 225 | 152.36 + | 1.48 | 2.15E-11 | 8.62E-10 |
| intracellular (GO:0005622)                | 6721 | 226 | 153.05 + | 1.48 | 1.66E-11 | 7.18E-10 |
| protein-containing complex (GO:0032991)   | 2747 | 90  | 62.55 +  | 1.44 | 4.99E-04 | 5.77E-03 |
| intracellular organelle (GO:0043229)      | 5332 | 166 | 121.42 + | 1.37 | 9.70E-06 | 1.40E-04 |

|                                                                                |       |     |          |      |          |          |
|--------------------------------------------------------------------------------|-------|-----|----------|------|----------|----------|
| organelle<br>(GO:0043<br>226)                                                  | 5434  | 169 | 123.74 + | 1.37 | 8.61E-06 | 1.28E-04 |
| membran<br>e-<br>bounded<br>organelle<br>(GO:0043<br>227)                      | 4721  | 139 | 107.5 +  | 1.29 | 9.90E-04 | 1.10E-02 |
| intracellul<br>ar<br>membran<br>e-<br>bounded<br>organelle<br>(GO:0043<br>231) | 4662  | 137 | 106.16 + | 1.29 | 1.37E-03 | 1.39E-02 |
| cell part<br>(GO:0044<br>464)                                                  | 8474  | 237 | 192.96 + | 1.23 | 8.34E-05 | 1.14E-03 |
| cell<br>(GO:0005<br>623)                                                       | 8474  | 237 | 192.96 + | 1.23 | 8.34E-05 | 1.11E-03 |
| cellular_c<br>omponen<br>t<br>(GO:0005<br>575)                                 | 9552  | 251 | 217.51 + | 1.15 | 3.18E-03 | 2.47E-02 |
| Unclassifi<br>ed<br>(UNCLAS<br>SIFIED)                                         | 12713 | 256 | 289.49 - | 0.88 | 3.18E-03 | 2.50E-02 |
| cell<br>periphery<br>(GO:0071<br>944)                                          | 3312  | 46  | 75.42 -  | 0.61 | 1.38E-04 | 1.75E-03 |
| plasma<br>membran<br>e<br>(GO:0005<br>886)                                     | 3243  | 45  | 73.85 -  | 0.61 | 1.98E-04 | 2.45E-03 |
| nucleus<br>(GO:0005<br>634)                                                    | 2974  | 41  | 67.72 -  | 0.61 | 3.27E-04 | 3.87E-03 |
| integral<br>compone<br>nt of<br>membran<br>e<br>(GO:0016<br>021)               | 1114  | 12  | 25.37 -  | 0.47 | 4.86E-03 | 3.72E-02 |
| intrinsic<br>compone<br>nt of<br>membran<br>e<br>(GO:0031<br>224)              | 1141  | 12  | 25.98 -  | 0.46 | 2.87E-03 | 2.33E-02 |



|                                                      |      |    |         |      |          |          |
|------------------------------------------------------|------|----|---------|------|----------|----------|
| extracellular region (GO:0005576)                    | 1253 | 13 | 28.53 - | 0.46 | 1.60E-03 | 1.54E-02 |
| extracellular region part (GO:0044421)               | 1253 | 13 | 28.53 - | 0.46 | 1.60E-03 | 1.51E-02 |
| extracellular space (GO:0005615)                     | 1169 | 11 | 26.62 - | 0.41 | 1.07E-03 | 1.16E-02 |
| integral component of plasma membrane (GO:0005887)   | 770  | 6  | 17.53 - | 0.34 | 2.70E-03 | 2.27E-02 |
| intrinsic component of plasma membrane (GO:0031226)  | 777  | 6  | 17.69 - | 0.34 | 2.76E-03 | 2.28E-02 |
| plasma membrane region (GO:0098590)                  | 582  | 4  | 13.25 - | 0.3  | 6.38E-03 | 4.74E-02 |
| plasma membrane part (GO:0044459)                    | 1622 | 11 | 36.93 - | 0.3  | 7.74E-07 | 1.34E-05 |
| plasma membrane bounded cell projection (GO:0120025) | 497  | 2  | 11.32 - | 0.18 | 1.82E-03 | 1.69E-02 |
| cell projection (GO:0042995)                         | 513  | 2  | 11.68 - | 0.17 | 1.28E-03 | 1.35E-02 |
| cell surface (GO:0009986)                            | 421  | 1  | 9.59 -  | 0.1  | 1.30E-03 | 1.35E-02 |

|                                                                   |     |   |        |        |          |          |
|-------------------------------------------------------------------|-----|---|--------|--------|----------|----------|
| neuron<br>part<br>(GO:0097<br>458)                                | 438 | 1 | 9.97 - | 0.1    | 8.97E-04 | 1.01E-02 |
| external<br>side of<br>plasma<br>membran<br>e<br>(GO:0009<br>897) | 318 | 0 | 7.24 - | < 0.01 | 1.58E-03 | 1.58E-02 |

Analysis Type: PANTHER Overrepresentation Test (Released 20200728)

Annotation Version and Release Date: PANTHER version 15.0 Released 2020-02-14

Analyzed List: protein.txt (Mus musculus)

Reference List: Mus musculus (all genes in database)

Test Type: FISHER

Correction: FDR

PANTHER GO-Slim Molecular Function Mus musci protein.txt protein.txt protein.txt protein.txt protein.txt protein.txt

|                                                  |   |   |        |       |          |          |
|--------------------------------------------------|---|---|--------|-------|----------|----------|
| oligosaccharyl transferase activity (GO:0004576) | 5 | 3 | 0.11 + | 26.35 | 5.65E-04 | 1.43E-02 |
|--------------------------------------------------|---|---|--------|-------|----------|----------|

|                                                  |    |   |        |       |          |          |
|--------------------------------------------------|----|---|--------|-------|----------|----------|
| flavin adenine dinucleotide binding (GO:0050660) | 30 | 8 | 0.68 + | 11.71 | 1.55E-06 | 6.87E-05 |
|--------------------------------------------------|----|---|--------|-------|----------|----------|

|                                  |    |   |        |      |          |          |
|----------------------------------|----|---|--------|------|----------|----------|
| cholesterol binding (GO:0015485) | 19 | 4 | 0.43 + | 9.25 | 1.54E-03 | 2.91E-02 |
|----------------------------------|----|---|--------|------|----------|----------|

|                             |    |   |        |      |          |          |
|-----------------------------|----|---|--------|------|----------|----------|
| sterol binding (GO:0032934) | 26 | 5 | 0.59 + | 8.45 | 5.65E-04 | 1.50E-02 |
|-----------------------------|----|---|--------|------|----------|----------|

|                                                 |     |    |        |     |          |          |
|-------------------------------------------------|-----|----|--------|-----|----------|----------|
| structural constituent of ribosome (GO:0003735) | 128 | 21 | 2.91 + | 7.2 | 1.83E-11 | 2.43E-09 |
|-------------------------------------------------|-----|----|--------|-----|----------|----------|

|                                                                                                    |     |    |         |      |          |          |
|----------------------------------------------------------------------------------------------------|-----|----|---------|------|----------|----------|
| oxidoreductase activity, acting on the CH-OH group of donors, NAD or NADP as acceptor (GO:0016616) | 76  | 11 | 1.73 +  | 6.36 | 3.64E-06 | 1.38E-04 |
| steroid binding (GO:0005496)                                                                       | 43  | 6  | 0.98 +  | 6.13 | 7.34E-04 | 1.62E-02 |
| ligase activity (GO:0016874)                                                                       | 88  | 12 | 2 +     | 5.99 | 2.32E-06 | 9.47E-05 |
| cofactor binding (GO:0048037)                                                                      | 169 | 22 | 3.85 +  | 5.72 | 3.35E-10 | 2.54E-08 |
| structural molecule activity (GO:0005198)                                                          | 218 | 23 | 4.96 +  | 4.63 | 5.40E-09 | 3.58E-07 |
| oxidoreductase activity (GO:0016491)                                                               | 443 | 45 | 10.09 + | 4.46 | 7.71E-16 | 4.09E-13 |
| catalytic activity, acting on a tRNA (GO:0140101)                                                  | 79  | 8  | 1.8 +   | 4.45 | 7.16E-04 | 1.65E-02 |
| actin filament binding (GO:0051015)                                                                | 84  | 8  | 1.91 +  | 4.18 | 1.04E-03 | 2.12E-02 |
| nucleoside phosphate binding (GO:1901265)                                                          | 220 | 20 | 5.01 +  | 3.99 | 4.90E-07 | 2.60E-05 |
| nucleotide binding (GO:0000166)                                                                    | 220 | 20 | 5.01 +  | 3.99 | 4.90E-07 | 2.37E-05 |

|                                                           |       |     |          |      |          |          |
|-----------------------------------------------------------|-------|-----|----------|------|----------|----------|
| small molecule binding<br>(GO:0036094)                    | 358   | 29  | 8.15 +   | 3.56 | 1.46E-08 | 8.60E-07 |
| actin binding<br>(GO:0003779)                             | 129   | 10  | 2.94 +   | 3.4  | 1.13E-03 | 2.22E-02 |
| anion binding<br>(GO:0043168)                             | 473   | 26  | 10.77 +  | 2.41 | 7.29E-05 | 2.42E-03 |
| ion binding<br>(GO:0043167)                               | 711   | 34  | 16.19 +  | 2.1  | 1.11E-04 | 3.47E-03 |
| catalytic activity<br>(GO:0003824)                        | 3715  | 156 | 84.59 +  | 1.84 | 1.25E-14 | 3.33E-12 |
| organic cyclic compound binding<br>(GO:0097159)           | 1680  | 60  | 38.26 +  | 1.57 | 6.83E-04 | 1.65E-02 |
| molecular_function<br>(GO:0003674)                        | 9001  | 247 | 204.96 + | 1.21 | 2.06E-04 | 5.77E-03 |
| Unclassified<br>(UNCLASSIFIED)                            | 13264 | 260 | 302.04 - | 0.86 | 2.06E-04 | 6.09E-03 |
| transcription regulator activity<br>(GO:0140110)          | 772   | 6   | 17.58 -  | 0.34 | 2.72E-03 | 4.81E-02 |
| DNA-binding transcription factor activity<br>(GO:0003700) | 618   | 3   | 14.07 -  | 0.21 | 8.01E-04 | 1.70E-02 |
| signaling receptor binding<br>(GO:0005102)                | 734   | 2   | 16.71 -  | 0.12 | 1.79E-05 | 6.35E-04 |

|                                                           |      |   |         |      |          |          |
|-----------------------------------------------------------|------|---|---------|------|----------|----------|
| G protein-coupled receptor activity<br>(GO:0004930)       | 405  | 1 | 9.22 -  | 0.11 | 1.88E-03 | 3.44E-02 |
| molecular transducer activity<br>(GO:0060089)             | 1349 | 3 | 30.72 - | 0.1  | 2.46E-10 | 2.18E-08 |
| transmembrane signaling receptor activity<br>(GO:0004888) | 1182 | 1 | 26.92 - | 0.04 | 8.50E-11 | 9.03E-09 |
| signaling receptor activity<br>(GO:0038023)               | 1282 | 1 | 29.19 - | 0.03 | 7.30E-12 | 1.29E-09 |

(FDR)

Analysis Type: PANTHER Overrepresentation Test (Released 20200728)

Annotation  
Version and Release Date: PANTHER version 15.0 Released 2020-02-14

Analyzed List: protein.txt (Saccharomyces cerevisiae)

Reference List: Saccharomyces cerevisiae (all genes in database)

Test Type: FISHER

Correction: FDR

PANTHER GO-Slim Biological Process Saccharon protein.txt protein.txt protein.txt protein.txt protein.txt protein.txt (FDR)

|                                               |     |    |         |      |          |          |
|-----------------------------------------------|-----|----|---------|------|----------|----------|
| small molecule metabolic process (GO:0044281) | 354 | 49 | 16.62 + | 2.95 | 5.93E-11 | 8.06E-08 |
|-----------------------------------------------|-----|----|---------|------|----------|----------|

|                                                           |     |    |         |      |          |          |
|-----------------------------------------------------------|-----|----|---------|------|----------|----------|
| organonitrogen compound biosynthetic process (GO:1901566) | 446 | 53 | 20.95 + | 2.53 | 1.47E-09 | 9.97E-07 |
|-----------------------------------------------------------|-----|----|---------|------|----------|----------|

|                                        |     |    |        |     |          |          |
|----------------------------------------|-----|----|--------|-----|----------|----------|
| oxoacid metabolic process (GO:0043436) | 194 | 31 | 9.11 + | 3.4 | 1.52E-08 | 4.14E-06 |
|----------------------------------------|-----|----|--------|-----|----------|----------|

|                                                |     |    |        |      |          |          |
|------------------------------------------------|-----|----|--------|------|----------|----------|
| carboxylic acid metabolic process (GO:0019752) | 190 | 31 | 8.92 + | 3.47 | 9.85E-09 | 4.46E-06 |
|------------------------------------------------|-----|----|--------|------|----------|----------|

|                                             |     |    |        |     |          |          |
|---------------------------------------------|-----|----|--------|-----|----------|----------|
| organic acid metabolic process (GO:0006082) | 194 | 31 | 9.11 + | 3.4 | 1.52E-08 | 5.17E-06 |
|---------------------------------------------|-----|----|--------|-----|----------|----------|



|                                                        |     |    |         |      |          |          |
|--------------------------------------------------------|-----|----|---------|------|----------|----------|
| cellular amino acid metabolic process (GO:0006520)     | 129 | 24 | 6.06 +  | 3.96 | 5.85E-08 | 1.33E-05 |
| organonitrogen compound metabolic process (GO:1901564) | 892 | 75 | 41.89 + | 1.79 | 7.15E-07 | 1.39E-04 |
| cellular amino acid biosynthetic process (GO:0008652)  | 60  | 15 | 2.82 +  | 5.32 | 8.28E-07 | 1.41E-04 |
| peptide metabolic process (GO:0006518)                 | 174 | 25 | 8.17 +  | 3.06 | 2.37E-06 | 3.58E-04 |
| peptide biosynthetic process (GO:0043043)              | 162 | 23 | 7.61 +  | 3.02 | 7.29E-06 | 6.60E-04 |
| organic acid biosynthetic process (GO:0016053)         | 83  | 16 | 3.9 +   | 4.1  | 6.84E-06 | 6.64E-04 |
| translation (GO:0006412)                               | 160 | 23 | 7.51 +  | 3.06 | 6.06E-06 | 6.86E-04 |
| carboxylic acid biosynthetic process (GO:0046394)      | 83  | 16 | 3.9 +   | 4.1  | 6.84E-06 | 7.15E-04 |
| cellular amide metabolic process (GO:0043603)          | 214 | 27 | 10.05 + | 2.69 | 8.44E-06 | 7.17E-04 |

|                                                                 |      |     |          |      |          |          |
|-----------------------------------------------------------------|------|-----|----------|------|----------|----------|
| amide<br>biosynthetic<br>process<br>(GO:0043604)                | 183  | 25  | 8.59 +   | 2.91 | 5.32E-06 | 7.23E-04 |
| translational<br>elongation<br>(GO:0006414)                     | 160  | 23  | 7.51 +   | 3.06 | 6.06E-06 | 7.49E-04 |
| small<br>molecule<br>biosynthetic<br>process<br>(GO:0044283)    | 139  | 20  | 6.53 +   | 3.06 | 2.46E-05 | 1.97E-03 |
| organic<br>substance<br>biosynthetic<br>process<br>(GO:1901576) | 796  | 62  | 37.38 +  | 1.66 | 8.48E-05 | 6.41E-03 |
| biosynthetic<br>process<br>(GO:0009058)                         | 810  | 62  | 38.04 +  | 1.63 | 1.38E-04 | 9.87E-03 |
| cellular<br>biosynthetic<br>process<br>(GO:0044249)             | 797  | 61  | 37.43 +  | 1.63 | 1.74E-04 | 1.18E-02 |
| cellular<br>process<br>(GO:0009987)                             | 2163 | 132 | 101.58 + | 1.3  | 3.03E-04 | 1.96E-02 |
| protein<br>folding<br>(GO:0006457)                              | 53   | 10  | 2.49 +   | 4.02 | 4.35E-04 | 2.69E-02 |

Analysis Type: PANTHER Overrepresentation Test (Released 20200728)

Annotation Version and Release Date: PANTHER version 15.0 Released 2020-02-14

Analyzed List: protein.txt (Saccharomyces cerevisiae)  
Reference List: Saccharomyces cerevisiae (all genes in database)

Test Type: FISHER

Correction: FDR

PANTHER GO-Slim Cellular Component  
Saccharon protein.txt protein.txt protein.txt protein.txt protein.txt protein.txt (FDR)

|                                                             |    |   |        |       |          |          |
|-------------------------------------------------------------|----|---|--------|-------|----------|----------|
| proteasome regulatory particle, lid subcomplex (GO:0008541) | 7  | 4 | 0.33 + | 12.17 | 1.02E-03 | 2.45E-02 |
| proteasome accessory complex (GO:0022624)                   | 14 | 5 | 0.66 + | 7.6   | 1.21E-03 | 2.61E-02 |
| proteasome regulatory particle (GO:0005838)                 | 14 | 5 | 0.66 + | 7.6   | 1.21E-03 | 2.48E-02 |
| proton-transporting two-sector ATPase complex (GO:0016469)  | 16 | 5 | 0.75 + | 6.65  | 1.97E-03 | 3.51E-02 |

|                                                |      |     |         |      |          |          |
|------------------------------------------------|------|-----|---------|------|----------|----------|
| endopeptidase complex (GO:1905369)             | 29   | 9   | 1.36 +  | 6.61 | 3.35E-05 | 1.24E-03 |
| proteasome complex (GO:0000502)                | 29   | 9   | 1.36 +  | 6.61 | 3.35E-05 | 1.14E-03 |
| peptidase complex (GO:1905368)                 | 43   | 9   | 2.02 +  | 4.46 | 4.35E-04 | 1.19E-02 |
| cytosolic small ribosomal subunit (GO:0022627) | 51   | 10  | 2.4 +   | 4.18 | 3.32E-04 | 9.71E-03 |
| small ribosomal subunit (GO:0015935)           | 68   | 11  | 3.19 +  | 3.44 | 7.23E-04 | 1.85E-02 |
| cytosolic part (GO:0044445)                    | 145  | 23  | 6.81 +  | 3.38 | 1.37E-06 | 9.31E-05 |
| cytosolic ribosome (GO:0022626)                | 123  | 17  | 5.78 +  | 2.94 | 1.57E-04 | 4.93E-03 |
| cytosol (GO:0005829)                           | 406  | 53  | 19.07 + | 2.78 | 6.26E-11 | 1.28E-08 |
| ribosomal subunit (GO:0044391)                 | 157  | 18  | 7.37 +  | 2.44 | 1.09E-03 | 2.47E-02 |
| ribosome (GO:0005840)                          | 164  | 18  | 7.7 +   | 2.34 | 1.47E-03 | 2.86E-02 |
| cytoplasmic part (GO:0044444)                  | 1197 | 104 | 56.21 + | 1.85 | 1.43E-10 | 1.94E-08 |
| cytoplasm (GO:0005737)                         | 1627 | 134 | 76.41 + | 1.75 | 1.26E-12 | 5.16E-10 |
| protein-containing complex (GO:0032991)        | 1139 | 76  | 53.49 + | 1.42 | 1.50E-03 | 2.78E-02 |

|                                    |      |     |          |      |          |          |
|------------------------------------|------|-----|----------|------|----------|----------|
| intracellular part<br>(GO:0044424) | 2319 | 154 | 108.91 + | 1.41 | 1.36E-07 | 1.39E-05 |
| intracellular<br>(GO:0005622)      | 2329 | 154 | 109.38 + | 1.41 | 1.95E-07 | 1.59E-05 |
| cell part<br>(GO:0044464)          | 2515 | 156 | 118.11 + | 1.32 | 1.13E-05 | 6.59E-04 |
| cell<br>(GO:0005623)               | 2515 | 156 | 118.11 + | 1.32 | 1.13E-05 | 5.76E-04 |
| cellular component<br>(GO:0005575) | 2596 | 159 | 121.92 + | 1.3  | 1.64E-05 | 7.48E-04 |
| Unclassified<br>(UNCLASSIFIED)     | 3430 | 124 | 161.08 - | 0.77 | 1.64E-05 | 6.73E-04 |

Analysis Type: PANTHER Overrepresentation Test (Released 20200728)

Annotation Version and Release Date: PANTHER version 15.0 Released 2020-02-14

Analyzed List: protein.txt (Saccharomyces cerevisiae)

Reference List: Saccharomyces cerevisiae (all genes in database)

Test Type: FISHER

Correction: FDR

PANTHER GO-Slim Molecular Function Saccharom protein.txt protein.txt protein.txt protein.txt protein.txt protein.txt

|                                |   |   |        |       |          |          |
|--------------------------------|---|---|--------|-------|----------|----------|
| chaperone binding (GO:0051087) | 8 | 5 | 0.38 + | 13.31 | 1.68E-04 | 1.45E-02 |
|--------------------------------|---|---|--------|-------|----------|----------|

|                                                     |    |   |        |      |          |          |
|-----------------------------------------------------|----|---|--------|------|----------|----------|
| translation initiation factor activity (GO:0003743) | 16 | 6 | 0.75 + | 7.98 | 3.14E-04 | 2.27E-02 |
|-----------------------------------------------------|----|---|--------|------|----------|----------|

|                                             |    |   |        |      |          |          |
|---------------------------------------------|----|---|--------|------|----------|----------|
| translation regulator activity (GO:0045182) | 30 | 7 | 1.41 + | 4.97 | 1.09E-03 | 3.96E-02 |
|---------------------------------------------|----|---|--------|------|----------|----------|

|                                     |    |   |        |      |          |          |
|-------------------------------------|----|---|--------|------|----------|----------|
| endopeptidase activity (GO:0004175) | 42 | 9 | 1.97 + | 4.56 | 3.74E-04 | 2.32E-02 |
|-------------------------------------|----|---|--------|------|----------|----------|

|                                                                |    |   |        |      |          |          |
|----------------------------------------------------------------|----|---|--------|------|----------|----------|
| ATPase-coupled transmembrane transporter activity (GO:0042626) | 40 | 8 | 1.88 + | 4.26 | 1.17E-03 | 3.91E-02 |
|----------------------------------------------------------------|----|---|--------|------|----------|----------|

|                                                                            |      |     |          |      |          |          |
|----------------------------------------------------------------------------|------|-----|----------|------|----------|----------|
| isomerase activity<br>(GO:0016853)                                         | 52   | 10  | 2.44 +   | 4.09 | 3.81E-04 | 2.07E-02 |
| primary active<br>transmembrane<br>transporter<br>activity<br>(GO:0015399) | 42   | 8   | 1.97 +   | 4.06 | 1.54E-03 | 4.77E-02 |
| ligase activity<br>(GO:0016874)                                            | 68   | 11  | 3.19 +   | 3.44 | 7.23E-04 | 3.14E-02 |
| oxidoreductase<br>activity<br>(GO:0016491)                                 | 185  | 20  | 8.69 +   | 2.3  | 8.83E-04 | 3.48E-02 |
| RNA binding<br>(GO:0003723)                                                | 285  | 28  | 13.38 +  | 2.09 | 3.82E-04 | 1.84E-02 |
| binding<br>(GO:0005488)                                                    | 981  | 72  | 46.07 +  | 1.56 | 1.18E-04 | 1.28E-02 |
| catalytic activity<br>(GO:0003824)                                         | 1460 | 105 | 68.57 +  | 1.53 | 2.83E-06 | 4.10E-04 |
| molecular_functio<br>n (GO:0003674)                                        | 2468 | 168 | 115.91 + | 1.45 | 1.53E-09 | 3.32E-07 |
| Unclassified<br>(UNCLASSIFIED)                                             | 3558 | 115 | 167.09 - | 0.69 | 1.53E-09 | 6.65E-07 |

(FDR)
